# Supplementary material for: Metabolic Implications of Using BioOrthogonal Non-Canonical Amino Acid Tagging (BONCAT) for Tracking Protein Synthesis
Source: PubMed Central journal article supplement (PMC7031258; doi:10.3389/fmicb.2020.00197), 2020-02-13
Supplement: Data_Sheet_1.pdf [file Data_Sheet_1.pdf]

**Table S1.** OD growth curves. All within 8.0% of the overall average at 1.3.

| Sample | OD    |         | Average OD |
|--------|-------|---------|------------|
|        | 0 min | 210 min |            |
| C1     | 0.871 | 1.231   | 1.217      |
| C2     | 0.871 | 1.264   |            |
| C3     | 0.871 | 1.224   |            |
| C4     | 0.871 | 1.180   |            |
| C5     | 0.871 | 1.184   |            |
| A1     | 0.870 | 1.290   | 1.335      |
| A2     | 0.870 | 1.349   |            |
| A3     | 0.870 | 1.412   |            |
| A4     | 0.870 | 1.276   |            |
| A5     | 0.870 | 1.347   |            |
| H1     | 0.872 | 1.493   | 1.418      |
| H2     | 0.872 | 1.311   |            |
| H3     | 0.872 | 1.354   |            |
| H4     | 0.872 | 1.456   |            |
| H5     | 0.872 | 1.474   |            |
| M1     | 0.871 | 1.283   | 1.265      |
| M2     | 0.871 | 1.230   |            |
| M3     | 0.871 | 1.258   |            |
| M4     | 0.871 | 1.334   |            |
| M5     | 0.871 | 1.222   |            |

**Table S2.** Bradford assay protein concentrations. All within 15.0% of the overall average at 2.1.

| <b>Sample #</b> | <b>mg/mL</b> | <b>Average mg/mL</b> |
|-----------------|--------------|----------------------|
| 1               | 1.94         | 1.83                 |
| 2               | 1.90         |                      |
| 3               | 1.87         |                      |
| 4               | 1.74         |                      |
| 5               | 1.69         |                      |
| 6               | 1.91         | 1.94                 |
| 7               | 1.91         |                      |
| 8               | 1.91         |                      |
| 9               | 2.16         |                      |
| 10              | 1.82         |                      |
| 11              | 2.15         | 2.36                 |
| 12              | 2.37         |                      |
| 13              | 2.45         |                      |
| 14              | 2.25         |                      |
| 15              | 2.56         |                      |
| 16              | 2.37         | 2.43                 |
| 17              | 2.35         |                      |
| 18              | 2.40         |                      |
| 19              | 2.40         |                      |
| 20              | 2.63         |                      |

**Table S3.** ANOVA single factor MS data in initial study

| <b>SUMMARY</b>             |              |            |                |                 |                |               |
|----------------------------|--------------|------------|----------------|-----------------|----------------|---------------|
| <b>Groups</b>              | <b>Count</b> | <b>Sum</b> | <b>Average</b> | <b>Variance</b> |                |               |
| CTRL avg                   | 4036         | 9.57E+08   | 237029         | 5.66E+11        |                |               |
| M1 avg                     | 4036         | 9.99E+08   | 247604         | 7.78E+11        |                |               |
| M50 avg                    | 4036         | 9.43E+08   | 233555         | 6.93E+11        |                |               |
| A1 avg                     | 4036         | 9.11E+08   | 225683         | 6.16E+11        |                |               |
| A50 avg                    | 4036         | 8.59E+08   | 212862         | 5.88E+11        |                |               |
| H1 avg                     | 4036         | 9.24E+08   | 228978         | 1.44E+12        |                |               |
| H50 avg                    | 4036         | 8.56E+08   | 212201         | 7.09E+11        |                |               |
| <b>ANOVA</b>               |              |            |                |                 |                |               |
| <b>Source of Variation</b> | <b>SS</b>    | <b>df</b>  | <b>MS</b>      | <b>F</b>        | <b>P-value</b> | <b>F crit</b> |
| Between Groups             | 3.96E+12     | 6          | 6.60E+11       | 0.85787         | 0.52509        | 2.09892       |
| Within Groups              | 2.17E+16     | 28245      | 7.69E+11       |                 |                |               |
| Total                      | 2.17E+16     | 28251      |                |                 |                |               |

ANOVA test on non-stressed data show that all are the same, because  $p$ -value is greater than the alpha value at 0.05, and the F value is much smaller than the F critical value.

**Table S4. NMR metabolites in initial study.**

| Metabolite              | Control |       | Met-1mM |       | Met-50µM |       | AHA-1mM |       | AHA-50µM |       | HPG-1mM |       | HPG-50µM |       |
|-------------------------|---------|-------|---------|-------|----------|-------|---------|-------|----------|-------|---------|-------|----------|-------|
|                         | Average | SD    | Average | SD    | Average  | SD    | Average | SD    | Average  | SD    | Average | SD    | Average  | SD    |
| 2-Aminobutyrate         | 3.0     | 0.3   | 1.8     | 0.5   | 3.3      | 0.7   | 2.7     | 1.8   | 2.5      | 0.8   | 1.0     | 0.4   | 1.2      | 0.0   |
| 4-Aminobutyrate         | 159.7   | 44.6  | 138.3   | 63.4  | 143.8    | 74.5  | 138.3   | 53.8  | 106.3    | 15.1  | 198.6   | 45.0  | 130.2    | 37.1  |
| Acetate                 | 613.4   | 225.4 | 747.9   | 245.0 | 691.1    | 134.6 | 675.0   | 255.0 | 429.4    | 85.3  | 604.8   | 184.3 | 345.5    | 105.8 |
| Acetoin                 | 2.6     | 0.5   | 3.0     | 1.0   | 2.1      | 0.9   | 2.2     | 1.7   | 1.8      | 0.4   | 1.0     | 0.6   | 1.4      | 0.5   |
| Adenosine               | 1.6     | 1.1   | 2.3     | 1.9   | 1.3      | 0.9   | 1.3     | 0.7   | 1.6      | 0.9   | 1.1     | 1.2   | 0.0      | 0.0   |
| Alanine                 | 123.6   | 28.8  | 119.1   | 19.4  | 125.7    | 6.2   | 85.3    | 43.9  | 71.0     | 10.9  | 65.7    | 43.2  | 57.7     | 7.4   |
| AMP                     | 10.3    | 4.4   | 6.6     | 6.6   | 11.9     | 2.7   | 6.4     | 2.2   | 3.4      | 1.9   | 5.8     | 1.2   | 8.3      | 0.9   |
| Aspartate               | 5.0     | 0.8   | 4.3     | 1.5   | 4.7      | 1.7   | 9.6     | 10.7  | 3.5      | 0.6   | 10.2    | 6.8   | 3.6      | 0.8   |
| Dimethylamine           | 1.9     | 0.3   | 2.0     | 0.3   | 1.8      | 0.2   | 1.5     | 0.5   | 1.0      | 0.2   | 1.1     | 0.2   | 1.4      | 0.3   |
| dTTP                    | 28.4    | 6.2   | 30.9    | 7.6   | 34.6     | 6.6   | 23.2    | 5.0   | 18.2     | 2.5   | 21.5    | 3.9   | 11.4     | 1.5   |
| Formate                 | 274.8   | 86.8  | 369.7   | 24.8  | 470.7    | 136.5 | 295.6   | 62.4  | 249.4    | 46.8  | 286.9   | 88.0  | 170.7    | 20.1  |
| Fumarate                | 5.6     | 2.0   | 4.2     | 0.3   | 3.5      | 0.7   | 5.7     | 2.8   | 4.5      | 0.5   | 3.1     | 0.6   | 5.6      | 1.0   |
| Glucose                 | 288.5   | 243.0 | 250.0   | 196.8 | 348.6    | 257.8 | 167.9   | 201.8 | 281.0    | 246.7 | 49.5    | 110.7 | 445.6    | 88.4  |
| Glucose-1-phosphate     | 6.2     | 1.3   | 7.0     | 1.4   | 7.1      | 1.3   | 4.9     | 1.3   | 3.8      | 0.8   | 3.9     | 1.1   | 5.7      | 0.9   |
| Glutamate               | 17.1    | 2.2   | 66.1    | 70.9  | 58.7     | 70.0  | 20.3    | 7.9   | 18.6     | 5.8   | 13.0    | 2.6   | 15.7     | 5.7   |
| Glutathione             | 36.1    | 4.6   | 47.8    | 7.5   | 54.4     | 21.2  | 28.4    | 11.3  | 21.0     | 4.7   | 32.6    | 6.6   | 23.7     | 2.4   |
| Glycine                 | 15.3    | 3.7   | 21.4    | 3.6   | 15.9     | 7.0   | 13.0    | 2.9   | 14.6     | 2.7   | 35.5    | 11.1  | 10.4     | 1.1   |
| Histidine               | 1.1     | 0.5   | 1.5     | 0.7   | 1.1      | 0.3   | 1.3     | 0.5   | 1.2      | 0.4   | 1.0     | 0.4   | 0.8      | 0.1   |
| Hypoxanthine            | 9.3     | 3.1   | 12.2    | 1.7   | 11.2     | 3.7   | 5.5     | 1.6   | 4.7      | 1.1   | 6.5     | 2.2   | 3.4      | 0.5   |
| Isoleucine              | 2.6     | 0.5   | 2.5     | 0.3   | 3.6      | 2.0   | 4.0     | 1.8   | 1.8      | 0.3   | 2.3     | 0.5   | 1.1      | 0.2   |
| Lactate                 | 118.1   | 62.0  | 210.3   | 38.9  | 158.5    | 61.8  | 73.9    | 31.2  | 46.5     | 13.8  | 71.5    | 65.7  | 37.2     | 12.2  |
| Leucine                 | 4.0     | 0.4   | 4.3     | 0.6   | 4.2      | 0.4   | 5.3     | 1.7   | 3.6      | 0.3   | 3.3     | 0.6   | 3.0      | 0.5   |
| Malate                  | 59.8    | 9.3   | 55.4    | 11.5  | 52.3     | 4.7   | 72.2    | 35.4  | 47.1     | 6.0   | 50.1    | 8.5   | 56.6     | 8.9   |
| Methionine              | 3.2     | 1.0   | 361.1   | 34.5  | 16.9     | 2.9   | 5.9     | 2.6   | 2.7      | 0.4   | 0.0     | 0.0   | 0.0      | 0.0   |
| N-Acetylaspargate       | 15.5    | 3.4   | 20.2    | 16.1  | 11.8     | 2.8   | 21.0    | 17.2  | 17.9     | 8.1   | 12.9    | 14.1  | 16.8     | 3.5   |
| N-Acetylglutamine       | 1.1     | 0.2   | 2.1     | 0.5   | 1.7      | 0.3   | 1.0     | 0.4   | 0.7      | 0.2   | 0.7     | 0.2   | 0.5      | 0.0   |
| NAD <sup>+</sup>        | 22.2    | 5.0   | 24.1    | 4.9   | 27.5     | 3.9   | 20.8    | 7.6   | 14.3     | 1.4   | 21.4    | 5.4   | 10.3     | 1.5   |
| NADP <sup>+</sup>       | 3.4     | 0.8   | 3.5     | 0.5   | 3.6      | 1.0   | 2.2     | 1.0   | 2.0      | 0.7   | 1.9     | 0.9   | 1.6      | 0.4   |
| Pantothenate            | 1.2     | 0.3   | 1.1     | 0.3   | 1.6      | 0.6   | 1.2     | 0.5   | 0.8      | 0.1   | 1.4     | 0.5   | 0.4      | 0.1   |
| Phenylalanine           | 2.5     | 0.6   | 2.2     | 1.0   | 2.2      | 1.7   | 2.0     | 0.4   | 1.7      | 0.5   | 2.1     | 0.7   | 1.7      | 0.3   |
| Propylene glycol        | 1.7     | 0.4   | 1.9     | 0.5   | 1.7      | 0.3   | 1.6     | 0.7   | 1.5      | 0.5   | 1.2     | 0.5   | 1.1      | 0.2   |
| Putrescine              | 53.5    | 18.5  | 64.6    | 30.8  | 52.2     | 13.7  | 50.8    | 21.4  | 49.7     | 13.7  | 59.3    | 25.7  | 36.0     | 9.7   |
| Pyruvate                | 95.0    | 28.0  | 129.4   | 42.8  | 105.9    | 59.5  | 54.8    | 35.7  | 34.7     | 23.8  | 20.3    | 19.5  | 47.3     | 10.5  |
| Succinate               | 97.3    | 27.2  | 119.1   | 8.7   | 143.4    | 57.3  | 92.8    | 32.3  | 67.7     | 27.9  | 114.9   | 30.4  | 39.9     | 5.7   |
| Tyrosine                | 9.6     | 2.5   | 10.4    | 1.2   | 10.4     | 3.9   | 7.7     | 3.0   | 5.4      | 1.1   | 5.9     | 2.7   | 7.1      | 1.5   |
| UDP-glucose             | 15.9    | 4.6   | 22.3    | 4.7   | 16.9     | 3.1   | 15.0    | 7.6   | 10.7     | 3.1   | 9.4     | 3.9   | 9.1      | 1.0   |
| UDP-N-Acetylglucosamine | 3.7     | 0.6   | 3.9     | 0.8   | 4.2      | 1.8   | 2.5     | 0.9   | 2.4      | 0.3   | 0.8     | 1.8   | 3.6      | 0.4   |
| UMP                     | 10.4    | 1.3   | 10.8    | 2.2   | 9.8      | 2.3   | 8.4     | 4.3   | 5.7      | 2.0   | 4.4     | 3.9   | 7.5      | 1.1   |
| Uracil                  | 11.6    | 3.2   | 10.9    | 5.1   | 13.5     | 2.2   | 6.7     | 2.7   | 7.7      | 1.9   | 8.1     | 4.4   | 3.1      | 0.4   |
| Valine                  | 14.3    | 2.6   | 17.8    | 4.6   | 16.1     | 2.4   | 13.0    | 5.2   | 9.7      | 2.2   | 8.0     | 2.2   | 6.4      | 0.6   |

\*Assignment with best-matched signals, all others validated.

**Table S5.** ANOVA single factor MS heat-stressed data.

| <b>SUMMARY</b>             |              |            |                |                 |                |               |
|----------------------------|--------------|------------|----------------|-----------------|----------------|---------------|
| <b>Groups</b>              | <b>Count</b> | <b>Sum</b> | <b>Average</b> | <b>Variance</b> |                |               |
| CTRL avg                   | 5960         | 9.80E+08   | 164503         | 1.53E+12        |                |               |
| MET avg                    | 5960         | 1.10E+09   | 184611         | 2.22E+12        |                |               |
| AHA avg                    | 5960         | 9.93E+08   | 166573         | 1.65E+12        |                |               |
| HPG avg                    | 5960         | 1.01E+09   | 169402         | 1.83E+12        |                |               |
| <b>ANOVA</b>               |              |            |                |                 |                |               |
| <b>Source of Variation</b> | <b>SS</b>    | <b>df</b>  | <b>MS</b>      | <b>F</b>        | <b>P-value</b> | <b>F crit</b> |
| Between Groups             | 1.49E+12     | 3          | 4.95E+11       | 0.27394         | 0.84424        | 2.60528       |
| Within Groups              | 4.31E+16     | 23836      | 1.81E+12       |                 |                |               |
| Total                      | 4.31E+16     | 23839      |                |                 |                |               |

**Table S6.** Tukey's results from MS ANOVA heat-stressed analysis. FC and t-test at 0.1 M v. C = 438 features, M v. H = 1119 features, M v. A = 465 features.

| MZ feature | f.value | p.value  | RT     | FDR      | Tukey's HSD                                             |
|------------|---------|----------|--------|----------|---------------------------------------------------------|
| 128.0671   | 169.6   | 2.46E-12 | 11.609 | 8.79E-09 | HPG-AHA; HPG-CTRL; MET-HPG                              |
| 334.9927   | 148.12  | 7.00E-12 | 11.155 | 1.25E-08 | HPG-AHA; HPG-CTRL; MET-HPG                              |
| 82.06306   | 109.35  | 7.15E-11 | 10.146 | 8.52E-08 | HPG-AHA; HPG-CTRL; MET-HPG                              |
| 614.1522   | 86.512  | 4.20E-10 | 9.3764 | 2.90E-07 | CTRL-AHA; HPG-AHA; HPG-CTRL; MET-HPG                    |
| 613.1495   | 85.707  | 4.51E-10 | 9.346  | 2.90E-07 | CTRL-AHA; HPG-AHA; MET-AHA; HPG-CTRL; MET-HPG           |
| 615.1487   | 84.844  | 4.86E-10 | 9.313  | 2.90E-07 | CTRL-AHA; HPG-AHA; HPG-CTRL; MET-HPG                    |
| 635.1304   | 82.439  | 6.03E-10 | 9.2194 | 3.04E-07 | CTRL-AHA; HPG-AHA; HPG-CTRL; MET-HPG                    |
| 219.076    | 81.135  | 6.80E-10 | 9.1676 | 3.04E-07 | CTRL-AHA; HPG-AHA; HPG-CTRL; MET-CTRL; MET-HPG          |
| 997.2834   | 77.759  | 9.34E-10 | 9.0297 | 3.71E-07 | CTRL-AHA; HPG-AHA; MET-AHA; HPG-CTRL; MET-HPG           |
| 999.2831   | 75.321  | 1.18E-09 | 8.9267 | 4.19E-07 | CTRL-AHA; HPG-AHA; MET-AHA; HPG-CTRL; MET-HPG           |
| 425.0357   | 74.471  | 1.29E-09 | 8.89   | 4.19E-07 | CTRL-AHA; MET-AHA; HPG-CTRL; MET-CTRL; MET-HPG          |
| 613.1494   | 71.637  | 1.72E-09 | 8.7648 | 4.63E-07 | CTRL-AHA; HPG-AHA; MET-AHA; HPG-CTRL; MET-CTRL; MET-HPG |
| 651.1023   | 71.206  | 1.80E-09 | 8.7454 | 4.63E-07 | HPG-AHA; HPG-CTRL; MET-HPG                              |
| 356.986    | 71.127  | 1.81E-09 | 8.7419 | 4.63E-07 | HPG-AHA; HPG-CTRL; MET-HPG                              |
| 84.95764   | 70.038  | 2.03E-09 | 8.6922 | 4.84E-07 | CTRL-AHA; HPG-AHA; MET-AHA; HPG-CTRL; MET-CTRL; MET-HPG |
| 255.9729   | 68.546  | 2.38E-09 | 8.6231 | 5.32E-07 | CTRL-AHA; HPG-AHA; MET-AHA; HPG-CTRL; MET-CTRL; MET-HPG |
| 622.0188   | 63.458  | 4.20E-09 | 8.3762 | 8.84E-07 | CTRL-AHA; MET-AHA; HPG-CTRL; MET-CTRL; MET-HPG          |
| 159.1455   | 60.438  | 6.01E-09 | 8.221  | 1.09E-06 | CTRL-AHA; MET-AHA; HPG-CTRL; MET-HPG                    |
| 614.1521   | 60.405  | 6.04E-09 | 8.2193 | 1.09E-06 | CTRL-AHA; HPG-AHA; HPG-CTRL; MET-CTRL; MET-HPG          |
| 140.0778   | 60.285  | 6.12E-09 | 8.2129 | 1.09E-06 | CTRL-AHA; MET-AHA; HPG-CTRL; MET-CTRL; MET-HPG          |
| 823.4129   | 58.394  | 7.73E-09 | 8.1119 | 1.32E-06 | HPG-AHA; HPG-CTRL; MET-HPG                              |
| 173.1247   | 57.464  | 8.69E-09 | 8.0611 | 1.41E-06 | CTRL-AHA; HPG-AHA; MET-AHA                              |
| 168.072    | 56.271  | 1.01E-08 | 7.9947 | 1.57E-06 | CTRL-AHA; HPG-AHA; MET-AHA; HPG-CTRL; MET-HPG           |
| 921.9953   | 54.912  | 1.21E-08 | 7.9176 | 1.80E-06 | CTRL-AHA; MET-AHA; HPG-CTRL; MET-CTRL; MET-HPG          |
| 125.9832   | 54.396  | 1.29E-08 | 7.8879 | 1.85E-06 | CTRL-AHA; HPG-AHA; MET-AHA; HPG-CTRL; MET-CTRL; MET-HPG |
| 384.9744   | 54.105  | 1.35E-08 | 7.8711 | 1.85E-06 | CTRL-AHA; HPG-AHA; MET-AHA; HPG-CTRL; MET-CTRL; MET-HPG |
| 824.416    | 52.933  | 1.58E-08 | 7.8023 | 2.09E-06 | CTRL-AHA; HPG-AHA; HPG-CTRL; MET-HPG                    |
| 939.3285   | 52.321  | 1.71E-08 | 7.7658 | 2.19E-06 | CTRL-AHA; HPG-AHA; HPG-CTRL; MET-HPG                    |
| 767.4632   | 51.419  | 1.94E-08 | 7.7113 | 2.40E-06 | CTRL-AHA; HPG-AHA; HPG-CTRL; MET-HPG                    |
| 881.3702   | 50.845  | 2.11E-08 | 7.6762 | 2.45E-06 | CTRL-AHA; HPG-AHA; HPG-CTRL; MET-HPG                    |
| 317.1124   | 50.803  | 2.12E-08 | 7.6736 | 2.45E-06 | CTRL-AHA; HPG-AHA; MET-AHA                              |
| 663.4688   | 50.168  | 2.32E-08 | 7.6343 | 2.59E-06 | HPG-AHA; HPG-CTRL; MET-HPG                              |
| 261.9587   | 49.961  | 2.39E-08 | 7.6214 | 2.59E-06 | CTRL-AHA; HPG-AHA; MET-AHA; HPG-CTRL; MET-HPG           |
| 300.2842   | 49.76   | 2.46E-08 | 7.6088 | 2.59E-06 | CTRL-AHA; MET-AHA; HPG-CTRL; MET-CTRL; MET-HPG          |
| 134.0423   | 48.977  | 2.76E-08 | 7.5594 | 2.82E-06 | CTRL-AHA; HPG-AHA; MET-AHA; HPG-CTRL; MET-HPG           |
| 283.2581   | 48.025  | 3.17E-08 | 7.4983 | 3.15E-06 | CTRL-AHA; MET-AHA; HPG-CTRL; MET-CTRL; MET-HPG          |
| 384.1085   | 47.391  | 3.49E-08 | 7.457  | 3.31E-06 | HPG-AHA; MET-AHA; HPG-CTRL; MET-HPG                     |
| 765.4545   | 47.336  | 3.52E-08 | 7.4534 | 3.31E-06 | HPG-AHA; HPG-CTRL; MET-HPG                              |
| 158.0435   | 46.817  | 3.81E-08 | 7.4192 | 3.42E-06 | CTRL-AHA; HPG-CTRL; MET-CTRL                            |
| 118.1198   | 46.785  | 3.83E-08 | 7.4171 | 3.42E-06 | CTRL-AHA; HPG-AHA; MET-AHA; HPG-CTRL; MET-HPG           |
| 825.4134   | 46.165  | 4.21E-08 | 7.3758 | 3.48E-06 | HPG-AHA; HPG-CTRL; MET-HPG                              |
| 941.3278   | 46.164  | 4.21E-08 | 7.3757 | 3.48E-06 | CTRL-AHA; HPG-AHA; HPG-CTRL; MET-HPG                    |
| 690.4968   | 46.136  | 4.23E-08 | 7.3739 | 3.48E-06 | HPG-AHA; HPG-CTRL; MET-HPG                              |
| 882.3721   | 46.048  | 4.29E-08 | 7.3679 | 3.48E-06 | CTRL-AHA; HPG-AHA; HPG-CTRL; MET-HPG                    |
| 226.1151   | 45.591  | 4.60E-08 | 7.3371 | 3.66E-06 | HPG-AHA; HPG-CTRL; MET-HPG                              |
| 132.0004   | 44.09   | 5.84E-08 | 7.2338 | 4.46E-06 | CTRL-AHA; HPG-AHA; MET-AHA; HPG-CTRL; MET-HPG           |
| 883.3709   | 44.063  | 5.86E-08 | 7.2319 | 4.46E-06 | CTRL-AHA; HPG-AHA; HPG-CTRL; MET-HPG                    |
| 168.0735   | 43.637  | 6.28E-08 | 7.2021 | 4.62E-06 | CTRL-AHA; HPG-AHA; MET-AHA; HPG-CTRL; MET-HPG           |
| 622.0184   | 43.59   | 6.33E-08 | 7.1988 | 4.62E-06 | CTRL-AHA; HPG-AHA; HPG-CTRL; MET-CTRL; MET-HPG          |
| 59.07153   | 42.815  | 7.18E-08 | 7.1436 | 5.11E-06 | CTRL-AHA; HPG-AHA; HPG-CTRL; MET-CTRL; MET-HPG          |
| 395.6704   | 42.686  | 7.34E-08 | 7.1344 | 5.11E-06 | CTRL-AHA; HPG-AHA; MET-AHA; HPG-CTRL; MET-HPG           |
| 691.5001   | 42.608  | 7.43E-08 | 7.1288 | 5.11E-06 | HPG-AHA; HPG-CTRL; MET-HPG                              |
| 693.5094   | 42.211  | 7.94E-08 | 7.1001 | 5.36E-06 | HPG-AHA; HPG-CTRL; MET-HPG                              |
| 662.4658   | 41.942  | 8.31E-08 | 7.0805 | 5.46E-06 | HPG-AHA; HPG-CTRL; MET-HPG                              |
| 837.6148   | 41.878  | 8.40E-08 | 7.0758 | 5.46E-06 | CTRL-AHA; HPG-AHA; MET-AHA; HPG-CTRL; MET-HPG           |
| 377.1388   | 41.248  | 9.34E-08 | 7.0295 | 5.92E-06 | HPG-AHA; HPG-CTRL; MET-HPG                              |
| 391.2777   | 41.184  | 9.45E-08 | 7.0247 | 5.92E-06 | CTRL-AHA; HPG-CTRL; MET-CTRL; MET-HPG                   |
| 470.2531   | 40.06   | 1.15E-07 | 6.9404 | 7.07E-06 | CTRL-AHA; HPG-AHA; HPG-CTRL; MET-HPG                    |
| 921.9952   | 39.715  | 1.22E-07 | 6.914  | 7.39E-06 | CTRL-AHA; HPG-AHA; HPG-CTRL; MET-CTRL; MET-HPG          |
| 178.9888   | 39.05   | 1.37E-07 | 6.8627 | 8.17E-06 | HPG-AHA; HPG-CTRL; MET-HPG                              |
| 766.4573   | 38.761  | 1.44E-07 | 6.8403 | 8.47E-06 | HPG-AHA; HPG-CTRL; MET-HPG                              |
| 144.0445   | 38.441  | 1.53E-07 | 6.8151 | 8.71E-06 | CTRL-AHA; HPG-AHA; MET-AHA; HPG-CTRL; MET-CTRL; MET-HPG |
| 202.1014   | 38.428  | 1.53E-07 | 6.8141 | 8.71E-06 | HPG-AHA; HPG-CTRL; MET-HPG                              |
| 523.1978   | 38.265  | 1.58E-07 | 6.8012 | 8.83E-06 | CTRL-AHA; HPG-CTRL; MET-CTRL                            |
| 522.1944   | 38.001  | 1.66E-07 | 6.7803 | 9.01E-06 | CTRL-AHA; MET-AHA; HPG-CTRL; MET-CTRL; MET-HPG          |
| 692.5048   | 37.983  | 1.66E-07 | 6.7788 | 9.01E-06 | HPG-AHA; HPG-CTRL; MET-HPG                              |
| 117.1357   | 37.478  | 1.83E-07 | 6.7384 | 9.74E-06 | CTRL-AHA; MET-AHA; HPG-CTRL; MET-HPG                    |
| 408.0006   | 37.041  | 1.98E-07 | 6.703  | 1.04E-05 | CTRL-AHA; HPG-AHA; HPG-CTRL; MET-HPG                    |
| 718.0465   | 36.827  | 2.06E-07 | 6.6856 | 1.07E-05 | CTRL-AHA; HPG-AHA; MET-AHA; HPG-CTRL; MET-HPG           |
| 614.152    | 36.646  | 2.13E-07 | 6.6708 | 1.09E-05 | CTRL-AHA; HPG-AHA; HPG-CTRL; MET-CTRL; MET-HPG          |

|          |        |          |        |          |                                                |
|----------|--------|----------|--------|----------|------------------------------------------------|
| 283.258  | 36.304 | 2.28E-07 | 6.6426 | 1.15E-05 | CTRL-AHA; MET-AHA; HPG-CTRL; MET-CTRL; MET-HPG |
| 688.4808 | 35.659 | 2.58E-07 | 6.5888 | 1.28E-05 | HPG-AHA; HPG-CTRL; MET-HPG                     |
| 462.0506 | 35.564 | 2.63E-07 | 6.5808 | 1.29E-05 | HPG-AHA; HPG-CTRL; MET-HPG                     |
| 424.0967 | 35.002 | 2.93E-07 | 6.5331 | 1.42E-05 | HPG-AHA; HPG-CTRL; MET-HPG                     |
| 219.13   | 34.528 | 3.22E-07 | 6.4924 | 1.53E-05 | CTRL-AHA; HPG-AHA; HPG-CTRL; MET-HPG           |
| 122.0933 | 33.615 | 3.87E-07 | 6.4125 | 1.81E-05 | CTRL-AHA; HPG-CTRL; MET-CTRL; MET-HPG          |
| 261.1229 | 33.518 | 3.95E-07 | 6.404  | 1.81E-05 | CTRL-AHA; HPG-AHA; MET-AHA; HPG-CTRL; MET-HPG  |
| 598.17   | 33.508 | 3.95E-07 | 6.4031 | 1.81E-05 | CTRL-AHA; HPG-AHA; MET-AHA; HPG-CTRL; MET-HPG  |
| 605.0016 | 32.626 | 4.74E-07 | 6.324  | 2.15E-05 | CTRL-AHA; HPG-AHA; MET-AHA; HPG-CTRL; MET-HPG  |
| 609.6501 | 32.297 | 5.08E-07 | 6.2941 | 2.25E-05 | CTRL-AHA; HPG-AHA; MET-AHA; HPG-CTRL; MET-HPG  |
| 303.136  | 32.251 | 5.13E-07 | 6.2898 | 2.25E-05 | CTRL-AHA; MET-AHA; HPG-CTRL; MET-HPG           |
| 172.0386 | 32.225 | 5.16E-07 | 6.2874 | 2.25E-05 | CTRL-AHA; MET-AHA; HPG-CTRL; MET-CTRL; MET-HPG |
| 395.6703 | 32.074 | 5.33E-07 | 6.2736 | 2.29E-05 | CTRL-AHA; HPG-AHA; MET-AHA; HPG-CTRL; MET-HPG  |
| 608.6577 | 31.325 | 6.25E-07 | 6.2039 | 2.65E-05 | CTRL-AHA; HPG-AHA; MET-AHA; HPG-CTRL; MET-HPG  |
| 631.1122 | 31.244 | 6.36E-07 | 6.1963 | 2.65E-05 | HPG-AHA; HPG-CTRL; MET-HPG                     |
| 535.8933 | 31.238 | 6.37E-07 | 6.1957 | 2.65E-05 | CTRL-AHA; HPG-AHA; HPG-CTRL; MET-HPG           |
| 423.9749 | 30.892 | 6.87E-07 | 6.163  | 2.78E-05 | CTRL-AHA; HPG-AHA; HPG-CTRL; MET-HPG           |
| 425.0983 | 30.864 | 6.91E-07 | 6.1604 | 2.78E-05 | HPG-AHA; HPG-CTRL; MET-HPG                     |
| 598.6707 | 30.855 | 6.93E-07 | 6.1595 | 2.78E-05 | CTRL-AHA; HPG-AHA; MET-AHA; HPG-CTRL; MET-HPG  |
| 622.0182 | 30.722 | 7.13E-07 | 6.1469 | 2.80E-05 | CTRL-AHA; HPG-AHA; HPG-CTRL; MET-CTRL; MET-HPG |
| 702.0789 | 30.687 | 7.19E-07 | 6.1435 | 2.80E-05 | CTRL-AHA; HPG-AHA; HPG-CTRL; MET-HPG           |
| 394.9512 | 30.673 | 7.21E-07 | 6.1421 | 2.80E-05 | HPG-AHA; HPG-CTRL; MET-HPG                     |
| 597.6689 | 30.551 | 7.40E-07 | 6.1305 | 2.82E-05 | CTRL-AHA; HPG-AHA; MET-AHA; HPG-CTRL; MET-HPG  |
| 689.4839 | 30.513 | 7.47E-07 | 6.1268 | 2.82E-05 | HPG-AHA; HPG-CTRL; MET-HPG                     |
| 437.2066 | 30.495 | 7.50E-07 | 6.1251 | 2.82E-05 | CTRL-AHA; MET-AHA; HPG-CTRL; MET-HPG           |
| 718.0466 | 30.033 | 8.31E-07 | 6.0804 | 3.09E-05 | CTRL-AHA; HPG-AHA; HPG-CTRL; MET-HPG           |
| 859.2791 | 29.633 | 9.09E-07 | 6.0414 | 3.35E-05 | HPG-AHA; HPG-CTRL; MET-HPG                     |
| 239.1244 | 29.511 | 9.35E-07 | 6.0293 | 3.41E-05 | MET-AHA; HPG-CTRL; MET-CTRL; MET-HPG           |
| 386.0198 | 29.319 | 9.76E-07 | 6.0103 | 3.53E-05 | CTRL-AHA; HPG-AHA; HPG-CTRL; MET-HPG           |
| 717.4595 | 29.207 | 1.00E-06 | 5.9992 | 3.58E-05 | HPG-AHA; HPG-CTRL; MET-HPG                     |
| 425.0079 | 28.886 | 1.08E-06 | 5.967  | 3.82E-05 | CTRL-AHA; MET-AHA; HPG-CTRL; MET-HPG           |
| 307.5795 | 28.804 | 1.10E-06 | 5.9588 | 3.85E-05 | HPG-AHA; HPG-CTRL; MET-HPG                     |
| 146.0365 | 28.661 | 1.14E-06 | 5.9443 | 3.95E-05 | CTRL-AHA; MET-AHA; HPG-CTRL; MET-HPG           |
| 445.9557 | 28.488 | 1.18E-06 | 5.9268 | 4.05E-05 | HPG-AHA; HPG-CTRL; MET-HPG                     |
| 144.0455 | 28.47  | 1.19E-06 | 5.925  | 4.05E-05 | CTRL-AHA; MET-AHA; HPG-CTRL; MET-CTRL; MET-HPG |
| 198.0808 | 28.36  | 1.22E-06 | 5.9137 | 4.11E-05 | CTRL-AHA; MET-AHA; HPG-CTRL; MET-CTRL; MET-HPG |
| 220.1319 | 28.232 | 1.26E-06 | 5.9007 | 4.20E-05 | HPG-AHA; HPG-CTRL; MET-HPG                     |
| 597.6687 | 28.108 | 1.29E-06 | 5.8879 | 4.28E-05 | CTRL-AHA; HPG-AHA; MET-AHA; HPG-CTRL; MET-HPG  |
| 153.0373 | 27.831 | 1.38E-06 | 5.8593 | 4.53E-05 | CTRL-AHA; HPG-AHA; HPG-CTRL; MET-HPG           |
| 571.2017 | 27.302 | 1.57E-06 | 5.8041 | 5.10E-05 | CTRL-AHA; HPG-AHA; HPG-CTRL; MET-HPG           |
| 688.1455 | 27.088 | 1.65E-06 | 5.7815 | 5.33E-05 | CTRL-AHA; HPG-AHA; MET-AHA; HPG-CTRL; MET-HPG  |
| 469.0623 | 26.878 | 1.74E-06 | 5.7591 | 5.56E-05 | CTRL-AHA; HPG-AHA; HPG-CTRL; MET-HPG           |
| 158.0435 | 26.781 | 1.78E-06 | 5.7487 | 5.64E-05 | CTRL-AHA; HPG-CTRL; MET-CTRL                   |
| 311.0875 | 26.578 | 1.88E-06 | 5.7269 | 5.87E-05 | CTRL-AHA; HPG-AHA; HPG-CTRL; MET-HPG           |
| 605.0014 | 26.55  | 1.89E-06 | 5.7239 | 5.87E-05 | CTRL-AHA; MET-AHA; HPG-CTRL; MET-HPG           |
| 572.9464 | 26.481 | 1.92E-06 | 5.7166 | 5.92E-05 | CTRL-AHA; HPG-AHA; HPG-CTRL; MET-HPG           |
| 616.6419 | 26.389 | 1.97E-06 | 5.7066 | 6.00E-05 | CTRL-AHA; HPG-AHA; MET-AHA; HPG-CTRL; MET-HPG  |
| 429.1327 | 26.226 | 2.05E-06 | 5.6888 | 6.20E-05 | CTRL-AHA; HPG-AHA; HPG-CTRL; MET-HPG           |
| 276.044  | 26.07  | 2.13E-06 | 5.6718 | 6.37E-05 | CTRL-AHA; MET-AHA; HPG-CTRL; MET-HPG           |
| 845.2762 | 26.055 | 2.14E-06 | 5.6702 | 6.37E-05 | CTRL-AHA; HPG-AHA; HPG-CTRL; MET-HPG           |
| 600.1662 | 25.993 | 2.17E-06 | 5.6633 | 6.41E-05 | CTRL-AHA; HPG-AHA; MET-AHA; HPG-CTRL; MET-HPG  |
| 300.283  | 25.722 | 2.33E-06 | 5.6335 | 6.81E-05 | CTRL-AHA; HPG-AHA; HPG-CTRL; MET-CTRL; MET-HPG |
| 416.082  | 25.58  | 2.41E-06 | 5.6178 | 7.01E-05 | HPG-AHA; HPG-CTRL; MET-HPG                     |
| 632.115  | 25.311 | 2.58E-06 | 5.5878 | 7.45E-05 | HPG-AHA; HPG-CTRL; MET-HPG                     |
| 275.041  | 25.055 | 2.76E-06 | 5.559  | 7.84E-05 | CTRL-AHA; MET-AHA; HPG-CTRL; MET-HPG           |
| 307.0895 | 25.053 | 2.76E-06 | 5.5587 | 7.84E-05 | HPG-AHA; HPG-CTRL; MET-HPG                     |
| 370.0449 | 24.941 | 2.84E-06 | 5.5461 | 8.01E-05 | CTRL-AHA; HPG-AHA; HPG-CTRL; MET-HPG           |
| 686.0868 | 24.574 | 3.13E-06 | 5.5041 | 8.71E-05 | CTRL-AHA; HPG-CTRL; MET-CTRL; MET-HPG          |
| 824.9636 | 24.561 | 3.14E-06 | 5.5027 | 8.71E-05 | CTRL-AHA; HPG-CTRL; MET-CTRL; MET-HPG          |
| 810.6257 | 24.527 | 3.17E-06 | 5.4988 | 8.72E-05 | CTRL-AHA; HPG-AHA; HPG-CTRL; MET-HPG           |
| 128.1403 | 24.432 | 3.25E-06 | 5.4878 | 8.88E-05 | CTRL-AHA; MET-AHA; HPG-CTRL; MET-CTRL; MET-HPG |
| 909.3967 | 24.244 | 3.42E-06 | 5.466  | 9.26E-05 | CTRL-AHA; HPG-CTRL; MET-HPG                    |
| 420.0487 | 24.103 | 3.55E-06 | 5.4497 | 9.50E-05 | CTRL-AHA; MET-AHA; HPG-CTRL; MET-HPG           |
| 168.0689 | 24.093 | 3.56E-06 | 5.4486 | 9.50E-05 | CTRL-AHA; HPG-AHA; MET-AHA; HPG-CTRL; MET-HPG  |
| 149.0774 | 24.058 | 3.59E-06 | 5.4444 | 9.52E-05 | CTRL-AHA; HPG-CTRL; MET-HPG                    |
| 225.8532 | 24.007 | 3.64E-06 | 5.4385 | 9.58E-05 | CTRL-AHA; HPG-CTRL; MET-CTRL; MET-HPG          |
| 597.6691 | 23.978 | 3.67E-06 | 5.4351 | 9.58E-05 | CTRL-AHA; HPG-AHA; MET-AHA; HPG-CTRL; MET-HPG  |
| 247.9936 | 23.916 | 3.73E-06 | 5.4278 | 9.67E-05 | CTRL-AHA; HPG-AHA; MET-AHA; HPG-CTRL; MET-HPG  |
| 760.5372 | 23.869 | 3.78E-06 | 5.4222 | 9.73E-05 | HPG-AHA; HPG-CTRL; MET-HPG                     |
| 533.2459 | 23.801 | 3.85E-06 | 5.4143 | 9.84E-05 | CTRL-AHA; HPG-AHA; HPG-CTRL; MET-HPG           |
| 237.0858 | 23.758 | 3.90E-06 | 5.4092 | 9.84E-05 | CTRL-AHA; HPG-AHA; MET-AHA; HPG-CTRL; MET-HPG  |
| 500.0049 | 23.744 | 3.91E-06 | 5.4076 | 9.84E-05 | HPG-AHA; HPG-CTRL; MET-HPG                     |
| 188.1718 | 23.721 | 3.94E-06 | 5.4049 | 9.84E-05 | MET-AHA; MET-CTRL; MET-HPG                     |
| 307.5796 | 23.615 | 4.05E-06 | 5.3923 | 0.000101 | HPG-AHA; HPG-CTRL; MET-HPG                     |

|          |        |          |        |          |                                                |
|----------|--------|----------|--------|----------|------------------------------------------------|
| 256.0985 | 23.339 | 4.37E-06 | 5.3594 | 0.000107 | CTRL-AHA; HPG-AHA; HPG-CTRL; MET-HPG           |
| 103.9531 | 23.336 | 4.37E-06 | 5.359  | 0.000107 | CTRL-AHA; HPG-AHA; HPG-CTRL; MET-CTRL; MET-HPG |
| 421.2288 | 23.318 | 4.40E-06 | 5.3569 | 0.000107 | CTRL-AHA; HPG-AHA; MET-AHA; MET-CTRL           |
| 164.9909 | 23.203 | 4.54E-06 | 5.3431 | 0.00011  | CTRL-AHA; HPG-CTRL; MET-CTRL; MET-HPG          |
| 293.1112 | 23.098 | 4.67E-06 | 5.3305 | 0.000111 | HPG-AHA; HPG-CTRL; MET-HPG                     |
| 307.1264 | 23.098 | 4.67E-06 | 5.3305 | 0.000111 | HPG-AHA; HPG-CTRL; MET-HPG                     |
| 811.2938 | 22.976 | 4.83E-06 | 5.3157 | 0.000114 | CTRL-AHA; HPG-AHA; HPG-CTRL; MET-HPG           |
| 687.0901 | 22.914 | 4.92E-06 | 5.3082 | 0.000116 | CTRL-AHA; HPG-CTRL; MET-CTRL; MET-HPG          |
| 418.9942 | 22.751 | 5.15E-06 | 5.2884 | 0.00012  | HPG-AHA; MET-AHA; HPG-CTRL; MET-HPG            |
| 598.1698 | 22.728 | 5.18E-06 | 5.2855 | 0.00012  | CTRL-AHA; HPG-AHA; HPG-CTRL; MET-HPG           |
| 832.9592 | 22.551 | 5.45E-06 | 5.2639 | 0.000126 | CTRL-AHA; HPG-AHA; HPG-CTRL; MET-HPG           |
| 402.9468 | 22.433 | 5.63E-06 | 5.2492 | 0.000129 | HPG-AHA; HPG-CTRL; MET-HPG                     |
| 233.0604 | 22.424 | 5.65E-06 | 5.2481 | 0.000129 | CTRL-AHA; HPG-CTRL; MET-CTRL                   |
| 116.0675 | 22.386 | 5.71E-06 | 5.2435 | 0.000129 | CTRL-AHA; HPG-CTRL; MET-CTRL                   |
| 592.1349 | 22.365 | 5.74E-06 | 5.2409 | 0.000129 | CTRL-AHA; HPG-AHA; MET-AHA                     |
| 268.1231 | 22.334 | 5.79E-06 | 5.2371 | 0.000129 | CTRL-AHA; HPG-CTRL; MET-CTRL; MET-HPG          |
| 175.0187 | 22.239 | 5.95E-06 | 5.2253 | 0.000132 | HPG-AHA; HPG-CTRL; MET-HPG                     |
| 831.9568 | 22.229 | 5.97E-06 | 5.224  | 0.000132 | CTRL-AHA; HPG-CTRL; MET-CTRL                   |
| 377.0975 | 22.102 | 6.19E-06 | 5.2082 | 0.000136 | HPG-AHA; HPG-CTRL; MET-HPG                     |
| 188.876  | 22.056 | 6.27E-06 | 5.2024 | 0.000137 | CTRL-AHA; MET-AHA; HPG-CTRL; MET-HPG           |
| 259.1555 | 21.894 | 6.57E-06 | 5.1821 | 0.000142 | CTRL-AHA; MET-AHA; HPG-CTRL; MET-HPG           |
| 402.2102 | 21.812 | 6.73E-06 | 5.1718 | 0.000145 | MET-AHA; MET-CTRL; MET-HPG                     |
| 216.954  | 21.681 | 7.00E-06 | 5.1552 | 0.00015  | HPG-AHA; HPG-CTRL; MET-HPG                     |
| 235.0712 | 21.592 | 7.18E-06 | 5.1439 | 0.000153 | HPG-AHA; HPG-CTRL; MET-HPG                     |
| 144.045  | 21.5   | 7.38E-06 | 5.1322 | 0.000156 | CTRL-AHA; MET-AHA; HPG-CTRL; MET-HPG           |
| 259.0674 | 21.302 | 7.82E-06 | 5.1068 | 0.000164 | CTRL-AHA; HPG-AHA; MET-AHA; HPG-CTRL; MET-HPG  |
| 319.1255 | 21.228 | 7.99E-06 | 5.0972 | 0.000167 | CTRL-AHA; MET-AHA; HPG-CTRL; MET-HPG           |
| 283.258  | 21.139 | 8.21E-06 | 5.0856 | 0.000171 | CTRL-AHA; HPG-CTRL; MET-CTRL; MET-HPG          |
| 192.0281 | 20.985 | 8.60E-06 | 5.0656 | 0.000178 | CTRL-AHA; MET-AHA; HPG-CTRL; MET-CTRL; MET-HPG |
| 624.6259 | 20.922 | 8.76E-06 | 5.0575 | 0.00018  | CTRL-AHA; MET-AHA; HPG-CTRL; MET-HPG           |
| 320.7104 | 20.825 | 9.02E-06 | 5.0447 | 0.000184 | CTRL-AHA; HPG-CTRL; MET-CTRL                   |
| 241.1794 | 20.734 | 9.27E-06 | 5.0328 | 0.000188 | CTRL-AHA; MET-AHA; HPG-CTRL; MET-HPG           |
| 656.8367 | 20.669 | 9.46E-06 | 5.0243 | 0.000191 | HPG-AHA; HPG-CTRL; MET-HPG                     |
| 173.039  | 20.621 | 9.59E-06 | 5.018  | 0.000193 | HPG-AHA; HPG-CTRL; MET-HPG                     |
| 591.1312 | 20.523 | 9.89E-06 | 5.005  | 0.000197 | CTRL-AHA; HPG-AHA; MET-AHA; HPG-CTRL           |
| 708.0687 | 20.301 | 1.06E-05 | 4.9754 | 0.00021  | CTRL-AHA; MET-AHA; HPG-CTRL; MET-HPG           |
| 704.0622 | 20.194 | 1.09E-05 | 4.9611 | 0.000216 | CTRL-AHA; MET-AHA; HPG-CTRL; MET-HPG           |
| 794.486  | 19.874 | 1.21E-05 | 4.9179 | 0.000237 | CTRL-AHA; HPG-AHA; HPG-CTRL; MET-HPG           |
| 457.2414 | 19.733 | 1.26E-05 | 4.8987 | 0.000247 | CTRL-AHA; HPG-AHA; MET-AHA; HPG-CTRL; MET-HPG  |
| 310.0818 | 19.707 | 1.27E-05 | 4.8951 | 0.000247 | CTRL-AHA; HPG-CTRL; MET-CTRL; MET-HPG          |
| 766.9187 | 19.566 | 1.33E-05 | 4.8759 | 0.000257 | HPG-AHA; HPG-CTRL; MET-HPG                     |
| 307.5797 | 19.491 | 1.36E-05 | 4.8655 | 0.000262 | HPG-AHA; MET-AHA; HPG-CTRL; MET-HPG            |
| 306.1902 | 19.469 | 1.37E-05 | 4.8626 | 0.000262 | CTRL-AHA; HPG-AHA; MET-CTRL; MET-HPG           |
| 851.9494 | 19.432 | 1.39E-05 | 4.8573 | 0.000264 | CTRL-AHA; HPG-CTRL; MET-CTRL                   |
| 147.1094 | 19.337 | 1.43E-05 | 4.8443 | 0.000271 | HPG-AHA; HPG-CTRL; MET-HPG                     |
| 96.04388 | 19.317 | 1.44E-05 | 4.8415 | 0.000271 | HPG-AHA; HPG-CTRL; MET-HPG                     |
| 823.6105 | 19.266 | 1.46E-05 | 4.8343 | 0.000274 | CTRL-AHA; HPG-AHA; HPG-CTRL; MET-HPG           |
| 385.1121 | 19.196 | 1.50E-05 | 4.8247 | 0.000278 | HPG-AHA; HPG-CTRL; MET-HPG                     |
| 189.1746 | 19.193 | 1.50E-05 | 4.8242 | 0.000278 | MET-AHA; MET-CTRL; MET-HPG                     |
| 480.9936 | 19.142 | 1.52E-05 | 4.8171 | 0.000281 | HPG-AHA; HPG-CTRL; MET-HPG                     |
| 221.0254 | 19.105 | 1.54E-05 | 4.8119 | 0.000282 | CTRL-AHA; HPG-CTRL; MET-HPG                    |
| 162.0182 | 19.095 | 1.55E-05 | 4.8104 | 0.000282 | CTRL-AHA; HPG-AHA; HPG-CTRL; MET-HPG           |
| 402.0125 | 19.013 | 1.59E-05 | 4.7989 | 0.000288 | CTRL-AHA; HPG-AHA; HPG-CTRL; MET-HPG           |
| 171.1452 | 18.894 | 1.65E-05 | 4.7822 | 0.000298 | MET-AHA; MET-CTRL; MET-HPG                     |
| 439.0625 | 18.751 | 1.73E-05 | 4.762  | 0.000311 | CTRL-AHA; HPG-CTRL; MET-CTRL                   |
| 606.1243 | 18.684 | 1.77E-05 | 4.7524 | 0.000316 | HPG-AHA; HPG-CTRL; MET-HPG                     |
| 367.0533 | 18.626 | 1.80E-05 | 4.7441 | 0.000321 | HPG-AHA; HPG-CTRL; MET-HPG                     |
| 921.9952 | 18.503 | 1.88E-05 | 4.7266 | 0.000332 | CTRL-AHA; HPG-CTRL; MET-CTRL; MET-HPG          |
| 283.258  | 18.439 | 1.92E-05 | 4.7174 | 0.000338 | CTRL-AHA; HPG-CTRL; MET-CTRL                   |
| 173.5405 | 18.301 | 2.01E-05 | 4.6975 | 0.000352 | HPG-AHA; HPG-CTRL; MET-HPG                     |
| 180.0476 | 18.242 | 2.05E-05 | 4.6889 | 0.000357 | CTRL-AHA; HPG-CTRL; MET-CTRL; MET-HPG          |
| 758.2555 | 18.198 | 2.08E-05 | 4.6826 | 0.00036  | CTRL-AHA; MET-AHA; HPG-CTRL; MET-HPG           |
| 382.9945 | 18.147 | 2.11E-05 | 4.6751 | 0.000365 | CTRL-AHA; MET-AHA; HPG-CTRL; MET-HPG           |
| 456.2377 | 18.126 | 2.13E-05 | 4.6721 | 0.000365 | CTRL-AHA; MET-AHA; HPG-CTRL; MET-HPG           |
| 102.1253 | 18.118 | 2.13E-05 | 4.6708 | 0.000365 | CTRL-AHA; MET-AHA; HPG-CTRL; MET-HPG           |
| 369.1177 | 18.095 | 2.15E-05 | 4.6676 | 0.000366 | HPG-AHA; HPG-CTRL; MET-HPG                     |
| 145.047  | 18.021 | 2.20E-05 | 4.6567 | 0.000373 | CTRL-AHA; MET-AHA; HPG-CTRL; MET-CTRL; MET-HPG |
| 520.9049 | 17.986 | 2.23E-05 | 4.6516 | 0.000376 | CTRL-AHA; HPG-AHA; HPG-CTRL; MET-HPG           |
| 832.2904 | 17.952 | 2.26E-05 | 4.6466 | 0.000379 | HPG-AHA; HPG-CTRL; MET-HPG                     |
| 171.1817 | 17.856 | 2.33E-05 | 4.6325 | 0.000389 | CTRL-AHA; MET-AHA; HPG-CTRL; MET-HPG           |
| 132.099  | 17.662 | 2.49E-05 | 4.6037 | 0.000414 | CTRL-AHA; HPG-CTRL; MET-CTRL                   |
| 616.6419 | 17.517 | 2.62E-05 | 4.5821 | 0.000432 | CTRL-AHA; HPG-AHA; MET-AHA; HPG-CTRL; MET-HPG  |
| 100.1096 | 17.509 | 2.62E-05 | 4.5809 | 0.000432 | CTRL-AHA; HPG-AHA; MET-AHA                     |
| 655.1169 | 17.474 | 2.66E-05 | 4.5758 | 0.000436 | HPG-AHA; HPG-CTRL; MET-HPG                     |



|          |        |          |        |          |                                                |
|----------|--------|----------|--------|----------|------------------------------------------------|
| 272.1374 | 17.46  | 2.67E-05 | 4.5736 | 0.000436 | CTRL-AHA; MET-AHA; HPG-CTRL; MET-HPG           |
| 118.0835 | 17.435 | 2.69E-05 | 4.5699 | 0.000437 | CTRL-AHA; HPG-AHA; HPG-CTRL; MET-CTRL          |
| 482.9484 | 17.388 | 2.74E-05 | 4.5627 | 0.000443 | HPG-AHA; HPG-CTRL; MET-HPG                     |
| 242.0615 | 17.332 | 2.79E-05 | 4.5543 | 0.000449 | CTRL-AHA; MET-AHA; HPG-CTRL; MET-HPG           |
| 141.0013 | 17.312 | 2.81E-05 | 4.5513 | 0.000449 | CTRL-AHA; HPG-CTRL; MET-HPG                    |
| 289.0438 | 17.311 | 2.81E-05 | 4.5511 | 0.000449 | HPG-AHA; HPG-CTRL; MET-HPG                     |
| 845.9586 | 17.29  | 2.83E-05 | 4.5481 | 0.00045  | CTRL-AHA; HPG-CTRL; MET-CTRL                   |
| 615.1509 | 17.2   | 2.92E-05 | 4.5344 | 0.000462 | CTRL-AHA; HPG-AHA; HPG-CTRL; MET-HPG           |
| 873.2821 | 17.069 | 3.06E-05 | 4.5145 | 0.00048  | HPG-AHA; HPG-CTRL; MET-HPG                     |
| 373.0805 | 17.064 | 3.06E-05 | 4.5138 | 0.00048  | CTRL-AHA; MET-AHA; HPG-CTRL; MET-HPG           |
| 846.2929 | 17.046 | 3.08E-05 | 4.511  | 0.000481 | CTRL-AHA; HPG-CTRL; MET-CTRL                   |
| 473.1627 | 16.994 | 3.14E-05 | 4.503  | 0.000488 | CTRL-AHA; MET-AHA; HPG-CTRL; MET-HPG           |
| 132.099  | 16.882 | 3.27E-05 | 4.4858 | 0.000506 | CTRL-AHA; HPG-CTRL; MET-CTRL                   |
| 394.9969 | 16.829 | 3.33E-05 | 4.4777 | 0.000513 | HPG-AHA; HPG-CTRL; MET-HPG                     |
| 825.2973 | 16.783 | 3.38E-05 | 4.4706 | 0.000519 | HPG-AHA; HPG-CTRL; MET-HPG                     |
| 764.6054 | 16.71  | 3.47E-05 | 4.4594 | 0.000531 | CTRL-AHA; HPG-CTRL; MET-CTRL                   |
| 402.8166 | 16.675 | 3.52E-05 | 4.454  | 0.000535 | CTRL-AHA; HPG-CTRL; MET-CTRL; MET-HPG          |
| 169.0786 | 16.651 | 3.55E-05 | 4.4501 | 0.000537 | CTRL-AHA; MET-AHA; HPG-CTRL; MET-HPG           |
| 405.0025 | 16.621 | 3.59E-05 | 4.4455 | 0.000541 | CTRL-AHA; HPG-CTRL; MET-HPG                    |
| 72.0791  | 16.486 | 3.76E-05 | 4.4245 | 0.000565 | CTRL-AHA; HPG-CTRL; MET-HPG                    |
| 383.0236 | 16.29  | 4.04E-05 | 4.3936 | 0.000604 | HPG-AHA; HPG-CTRL; MET-HPG                     |
| 479.0816 | 16.262 | 4.08E-05 | 4.3892 | 0.000608 | HPG-AHA; HPG-CTRL; MET-HPG                     |
| 405.0024 | 16.197 | 4.18E-05 | 4.3789 | 0.000617 | CTRL-AHA; HPG-CTRL; MET-HPG                    |
| 260.0701 | 16.19  | 4.19E-05 | 4.3778 | 0.000617 | HPG-AHA; HPG-CTRL; MET-HPG                     |
| 372.9554 | 16.187 | 4.19E-05 | 4.3774 | 0.000617 | HPG-AHA; HPG-CTRL; MET-HPG                     |
| 607.1046 | 16.119 | 4.30E-05 | 4.3665 | 0.00063  | CTRL-AHA; MET-AHA; HPG-CTRL                    |
| 824.6286 | 16.077 | 4.37E-05 | 4.3599 | 0.000636 | CTRL-AHA; HPG-CTRL; MET-CTRL                   |
| 636.4502 | 16.066 | 4.38E-05 | 4.3581 | 0.000636 | HPG-AHA; HPG-CTRL; MET-HPG                     |
| 304.1808 | 16.059 | 4.40E-05 | 4.357  | 0.000636 | CTRL-AHA; HPG-AHA; HPG-CTRL; MET-CTRL          |
| 420.2265 | 15.999 | 4.49E-05 | 4.3474 | 0.000648 | CTRL-AHA; HPG-AHA; MET-CTRL; MET-HPG           |
| 823.2758 | 15.921 | 4.62E-05 | 4.3349 | 0.000664 | HPG-AHA; HPG-CTRL; MET-HPG                     |
| 489.9245 | 15.911 | 4.64E-05 | 4.3332 | 0.000664 | CTRL-AHA; HPG-CTRL; MET-HPG                    |
| 648.2625 | 15.802 | 4.83E-05 | 4.3158 | 0.000688 | CTRL-AHA; HPG-CTRL; MET-HPG                    |
| 307.0785 | 15.779 | 4.87E-05 | 4.3121 | 0.000691 | HPG-AHA; HPG-CTRL; MET-HPG                     |
| 157.0418 | 15.709 | 5.00E-05 | 4.3007 | 0.000707 | CTRL-AHA; MET-AHA; HPG-CTRL                    |
| 750.9434 | 15.631 | 5.15E-05 | 4.288  | 0.000725 | HPG-AHA; HPG-CTRL; MET-HPG                     |
| 771.5548 | 15.606 | 5.20E-05 | 4.284  | 0.000729 | CTRL-AHA; HPG-CTRL; MET-CTRL                   |
| 433.1229 | 15.561 | 5.29E-05 | 4.2766 | 0.000739 | HPG-AHA; HPG-CTRL; MET-HPG                     |
| 192.0272 | 15.512 | 5.39E-05 | 4.2687 | 0.000749 | CTRL-AHA; MET-AHA; HPG-CTRL; MET-CTRL          |
| 617.1651 | 15.499 | 5.41E-05 | 4.2665 | 0.00075  | CTRL-AHA; HPG-AHA; HPG-CTRL; MET-HPG           |
| 352.2203 | 15.453 | 5.51E-05 | 4.2589 | 0.00076  | CTRL-AHA; MET-AHA; HPG-CTRL                    |
| 277.0402 | 15.431 | 5.55E-05 | 4.2554 | 0.000764 | CTRL-AHA; MET-AHA; HPG-CTRL; MET-HPG           |
| 411.1067 | 15.42  | 5.58E-05 | 4.2535 | 0.000764 | CTRL-AHA; HPG-CTRL; MET-HPG                    |
| 446.0681 | 15.323 | 5.79E-05 | 4.2375 | 0.00079  | HPG-AHA; HPG-CTRL; MET-HPG                     |
| 832.2893 | 15.255 | 5.94E-05 | 4.2262 | 0.000807 | CTRL-AHA; HPG-CTRL; MET-CTRL                   |
| 174.0385 | 15.066 | 6.39E-05 | 4.1948 | 0.000865 | HPG-AHA; HPG-CTRL; MET-HPG                     |
| 859.9611 | 15.017 | 6.51E-05 | 4.1867 | 0.000878 | CTRL-AHA; HPG-CTRL; MET-CTRL                   |
| 449.7817 | 14.993 | 6.57E-05 | 4.1827 | 0.000882 | CTRL-AHA; HPG-CTRL; MET-CTRL                   |
| 129.9289 | 14.98  | 6.60E-05 | 4.1805 | 0.000884 | CTRL-AHA; HPG-CTRL; MET-CTRL                   |
| 724.9749 | 14.97  | 6.62E-05 | 4.1789 | 0.000884 | HPG-AHA; HPG-CTRL; MET-HPG                     |
| 832.6236 | 14.961 | 6.65E-05 | 4.1772 | 0.000884 | HPG-AHA; HPG-CTRL; MET-HPG                     |
| 370.2523 | 14.922 | 6.75E-05 | 4.1707 | 0.000894 | CTRL-AHA; HPG-CTRL; MET-CTRL                   |
| 402.0676 | 14.845 | 6.95E-05 | 4.1577 | 0.000917 | CTRL-AHA; HPG-CTRL; MET-HPG                    |
| 665.1087 | 14.79  | 7.10E-05 | 4.1485 | 0.000934 | CTRL-AHA; HPG-CTRL; MET-CTRL                   |
| 378.2164 | 14.702 | 7.35E-05 | 4.1335 | 0.000963 | CTRL-AHA; HPG-AHA; MET-AHA; HPG-CTRL; MET-CTRL |
| 397.0897 | 14.687 | 7.40E-05 | 4.131  | 0.000965 | HPG-AHA; HPG-CTRL; MET-HPG                     |
| 189.1746 | 14.59  | 7.68E-05 | 4.1145 | 0.000997 | MET-AHA; MET-CTRL; MET-HPG                     |
| 534.8978 | 14.586 | 7.70E-05 | 4.1138 | 0.000997 | CTRL-AHA; HPG-CTRL; MET-HPG                    |
| 636.1335 | 14.571 | 7.74E-05 | 4.1112 | 0.000999 | HPG-AHA; HPG-CTRL; MET-HPG                     |
| 156.0386 | 14.549 | 7.81E-05 | 4.1075 | 0.001004 | CTRL-AHA; MET-AHA; HPG-CTRL                    |
| 116.0676 | 14.536 | 7.85E-05 | 4.1051 | 0.001006 | CTRL-AHA; HPG-CTRL; MET-CTRL                   |
| 665.4842 | 14.515 | 7.92E-05 | 4.1015 | 0.001008 | HPG-AHA; HPG-CTRL; MET-HPG                     |
| 979.5301 | 14.512 | 7.92E-05 | 4.1011 | 0.001008 | CTRL-AHA; HPG-AHA; HPG-CTRL; MET-HPG           |
| 692.1309 | 14.471 | 8.05E-05 | 4.0941 | 0.001021 | HPG-AHA; HPG-CTRL; MET-HPG                     |
| 418.0747 | 14.45  | 8.12E-05 | 4.0904 | 0.001026 | HPG-AHA; HPG-CTRL; MET-HPG                     |
| 481.2328 | 14.393 | 8.31E-05 | 4.0806 | 0.001046 | CTRL-AHA; MET-AHA; HPG-CTRL; MET-HPG           |
| 360.1707 | 14.362 | 8.41E-05 | 4.0752 | 0.001055 | CTRL-AHA; HPG-CTRL; MET-CTRL                   |
| 438.1669 | 14.342 | 8.48E-05 | 4.0718 | 0.00106  | HPG-AHA; HPG-CTRL; MET-HPG                     |
| 417.082  | 14.21  | 8.94E-05 | 4.0489 | 0.001113 | HPG-AHA; HPG-CTRL; MET-HPG                     |
| 200.9836 | 14.123 | 9.25E-05 | 4.0337 | 0.001149 | HPG-AHA; HPG-CTRL; MET-HPG                     |
| 564.0406 | 14.104 | 9.33E-05 | 4.0303 | 0.001154 | CTRL-AHA; HPG-CTRL; MET-CTRL                   |
| 73.04166 | 14.076 | 9.43E-05 | 4.0255 | 0.001163 | HPG-AHA; HPG-CTRL; MET-HPG                     |
| 321.1064 | 14.037 | 9.58E-05 | 4.0185 | 0.001177 | HPG-AHA; HPG-CTRL; MET-HPG                     |
| 372.077  | 13.951 | 9.92E-05 | 4.0034 | 0.001215 | HPG-AHA; HPG-CTRL; MET-HPG                     |

|          |        |          |        |          |                                       |
|----------|--------|----------|--------|----------|---------------------------------------|
| 678.4901 | 13.925 | 0.0001   | 3.9988 | 0.001224 | HPG-AHA; HPG-CTRL; MET-HPG            |
| 559.9045 | 13.829 | 0.000104 | 3.9819 | 0.001268 | CTRL-AHA; HPG-CTRL; MET-HPG           |
| 394.9508 | 13.694 | 0.00011  | 3.9577 | 0.001336 | HPG-AHA; HPG-CTRL; MET-HPG            |
| 466.1084 | 13.68  | 0.000111 | 3.9553 | 0.001339 | HPG-AHA; HPG-CTRL; MET-HPG            |
| 462.1224 | 13.622 | 0.000114 | 3.9449 | 0.001367 | CTRL-AHA; HPG-AHA; MET-AHA; MET-CTRL  |
| 508.1504 | 13.554 | 0.000117 | 3.9326 | 0.0014   | CTRL-AHA; HPG-CTRL; MET-HPG           |
| 784.0531 | 13.547 | 0.000117 | 3.9315 | 0.0014   | CTRL-AHA; HPG-CTRL; MET-HPG           |
| 421.935  | 13.535 | 0.000118 | 3.9292 | 0.001403 | HPG-AHA; HPG-CTRL; MET-HPG            |
| 219.0755 | 13.474 | 0.000121 | 3.9183 | 0.001434 | CTRL-AHA; HPG-CTRL; MET-CTRL          |
| 423.1836 | 13.375 | 0.000126 | 3.9002 | 0.00149  | MET-AHA; HPG-CTRL; MET-HPG            |
| 757.7545 | 13.365 | 0.000126 | 3.8984 | 0.001491 | CTRL-AHA; MET-AHA; HPG-CTRL; MET-HPG  |
| 536.8797 | 13.352 | 0.000127 | 3.8961 | 0.001494 | CTRL-AHA; HPG-AHA; HPG-CTRL; MET-HPG  |
| 399.9712 | 13.298 | 0.00013  | 3.8863 | 0.001523 | CTRL-AHA; HPG-AHA; HPG-CTRL; MET-HPG  |
| 491.8094 | 13.273 | 0.000131 | 3.8817 | 0.001534 | CTRL-AHA; HPG-CTRL; MET-CTRL          |
| 676.4811 | 13.258 | 0.000132 | 3.8789 | 0.001539 | HPG-AHA; HPG-CTRL; MET-HPG            |
| 339.1708 | 13.247 | 0.000133 | 3.877  | 0.001541 | CTRL-AHA; HPG-AHA; MET-HPG            |
| 143.1508 | 13.217 | 0.000134 | 3.8715 | 0.001555 | CTRL-AHA; HPG-CTRL; MET-CTRL          |
| 163.057  | 13.122 | 0.00014  | 3.8539 | 0.001614 | CTRL-AHA; HPG-CTRL; MET-CTRL; MET-HPG |
| 818.6205 | 13.113 | 0.000141 | 3.8523 | 0.001615 | HPG-AHA; HPG-CTRL; MET-HPG            |
| 587.027  | 13.097 | 0.000141 | 3.8494 | 0.001621 | CTRL-AHA; MET-AHA; HPG-CTRL; MET-HPG  |
| 312.1085 | 13.061 | 0.000144 | 3.8427 | 0.001641 | CTRL-AHA; HPG-AHA; MET-CTRL           |
| 702.4954 | 12.924 | 0.000152 | 3.8174 | 0.001734 | HPG-AHA; HPG-CTRL; MET-HPG            |
| 465.0275 | 12.81  | 0.00016  | 3.796  | 0.001816 | HPG-AHA; HPG-CTRL; MET-HPG            |
| 143.1508 | 12.785 | 0.000162 | 3.7914 | 0.001829 | CTRL-AHA; HPG-CTRL; MET-HPG           |
| 589.0333 | 12.776 | 0.000162 | 3.7897 | 0.00183  | HPG-AHA; HPG-CTRL; MET-HPG            |
| 400.9488 | 12.752 | 0.000164 | 3.7851 | 0.001844 | HPG-AHA; HPG-CTRL; MET-HPG            |
| 307.0789 | 12.731 | 0.000166 | 3.7812 | 0.001853 | HPG-AHA; HPG-CTRL; MET-HPG            |
| 455.2523 | 12.726 | 0.000166 | 3.7803 | 0.001853 | HPG-AHA; HPG-CTRL; MET-HPG            |
| 345.0401 | 12.706 | 0.000167 | 3.7765 | 0.001863 | CTRL-AHA; MET-AHA; HPG-CTRL; MET-HPG  |
| 677.4844 | 12.684 | 0.000169 | 3.7724 | 0.001873 | HPG-AHA; HPG-CTRL; MET-HPG            |
| 186.2175 | 12.679 | 0.000169 | 3.7715 | 0.001873 | HPG-AHA; HPG-CTRL; MET-HPG            |
| 319.1116 | 12.67  | 0.00017  | 3.7696 | 0.001873 | HPG-AHA; HPG-CTRL; MET-HPG            |
| 420.0489 | 12.665 | 0.00017  | 3.7688 | 0.001873 | CTRL-AHA; MET-AHA; HPG-CTRL           |
| 143.0782 | 12.615 | 0.000174 | 3.7593 | 0.001903 | CTRL-AHA; MET-AHA; HPG-CTRL           |
| 387.0203 | 12.614 | 0.000174 | 3.7592 | 0.001903 | HPG-AHA; HPG-CTRL; MET-HPG            |
| 618.8803 | 12.606 | 0.000175 | 3.7576 | 0.001905 | HPG-AHA; HPG-CTRL; MET-HPG            |
| 368.005  | 12.592 | 0.000176 | 3.7549 | 0.001905 | HPG-AHA; HPG-CTRL; MET-HPG            |
| 76.0197  | 12.585 | 0.000176 | 3.7536 | 0.001905 | CTRL-AHA; HPG-CTRL; MET-HPG           |
| 702.0786 | 12.585 | 0.000176 | 3.7536 | 0.001905 | CTRL-AHA; HPG-CTRL; MET-HPG           |
| 285.9626 | 12.565 | 0.000178 | 3.7499 | 0.001916 | CTRL-AHA; HPG-AHA; HPG-CTRL; MET-HPG  |
| 176.0993 | 12.543 | 0.00018  | 3.7457 | 0.001925 | HPG-AHA; HPG-CTRL; MET-HPG            |
| 846.6265 | 12.54  | 0.00018  | 3.7452 | 0.001925 | CTRL-AHA; HPG-CTRL; MET-CTRL          |
| 472.2145 | 12.492 | 0.000184 | 3.7359 | 0.00196  | CTRL-AHA; MET-AHA; HPG-CTRL; MET-HPG  |
| 572.9469 | 12.438 | 0.000188 | 3.7256 | 0.002001 | HPG-AHA; HPG-CTRL; MET-HPG            |
| 477.2414 | 12.327 | 0.000198 | 3.7044 | 0.002095 | MET-AHA; MET-CTRL; MET-HPG            |
| 403.0226 | 12.282 | 0.000201 | 3.6958 | 0.002131 | CTRL-AHA; MET-AHA; HPG-CTRL           |
| 326.0417 | 12.266 | 0.000203 | 3.6926 | 0.00214  | HPG-AHA; HPG-CTRL; MET-HPG            |
| 378.9783 | 12.236 | 0.000206 | 3.6868 | 0.002163 | HPG-AHA; HPG-CTRL; MET-HPG            |
| 569.1498 | 12.174 | 0.000211 | 3.6749 | 0.002217 | CTRL-AHA; MET-AHA; HPG-CTRL           |
| 134.0416 | 12.163 | 0.000212 | 3.6727 | 0.002221 | MET-AHA; HPG-CTRL; MET-HPG            |
| 588.9191 | 12.142 | 0.000214 | 3.6686 | 0.002235 | HPG-AHA; HPG-CTRL; MET-HPG            |
| 560.1328 | 12.132 | 0.000215 | 3.6667 | 0.002239 | HPG-AHA; HPG-CTRL; MET-HPG            |
| 232.02   | 12.107 | 0.000218 | 3.6618 | 0.002258 | CTRL-AHA; MET-AHA; HPG-CTRL; MET-HPG  |
| 200.9833 | 12.068 | 0.000222 | 3.6542 | 0.002291 | HPG-AHA; HPG-CTRL; MET-HPG            |
| 241.2174 | 12.049 | 0.000224 | 3.6505 | 0.002304 | CTRL-AHA; MET-AHA; HPG-CTRL; MET-HPG  |
| 890.7436 | 12.026 | 0.000226 | 3.6461 | 0.002321 | CTRL-AHA; HPG-CTRL; MET-HPG           |
| 980.0314 | 12.018 | 0.000227 | 3.6446 | 0.002322 | CTRL-AHA; HPG-CTRL; MET-HPG           |
| 258.1457 | 11.928 | 0.000236 | 3.6269 | 0.002412 | CTRL-AHA; HPG-AHA; MET-AHA            |
| 372.0315 | 11.887 | 0.000241 | 3.6189 | 0.00245  | HPG-AHA; HPG-CTRL; MET-HPG            |
| 268.1477 | 11.832 | 0.000247 | 3.6079 | 0.002505 | CTRL-AHA; HPG-CTRL; MET-CTRL          |
| 766.916  | 11.795 | 0.000251 | 3.6006 | 0.00254  | HPG-AHA; HPG-CTRL; MET-HPG            |
| 632.8737 | 11.745 | 0.000257 | 3.5908 | 0.002583 | CTRL-AHA; HPG-CTRL; MET-HPG           |
| 258.6563 | 11.741 | 0.000257 | 3.59   | 0.002583 | CTRL-AHA; HPG-CTRL; MET-HPG           |
| 161.0984 | 11.74  | 0.000257 | 3.5897 | 0.002583 | CTRL-AHA; HPG-CTRL; MET-HPG           |
| 242.0613 | 11.711 | 0.000261 | 3.5839 | 0.00261  | CTRL-AHA; HPG-CTRL; MET-HPG           |
| 672.8103 | 11.7   | 0.000262 | 3.5817 | 0.002616 | HPG-AHA; HPG-CTRL; MET-HPG            |
| 240.1545 | 11.689 | 0.000263 | 3.5796 | 0.002622 | CTRL-AHA; HPG-CTRL; MET-HPG           |
| 846.961  | 11.669 | 0.000266 | 3.5757 | 0.002638 | CTRL-AHA; HPG-CTRL; MET-HPG           |
| 818.2865 | 11.631 | 0.00027  | 3.568  | 0.002678 | HPG-AHA; HPG-CTRL; MET-HPG            |
| 239.0871 | 11.546 | 0.000281 | 3.551  | 0.002777 | MET-AHA; MET-CTRL; MET-HPG            |
| 664.4804 | 11.512 | 0.000286 | 3.5441 | 0.002814 | HPG-AHA; HPG-CTRL; MET-HPG            |
| 486.0867 | 11.49  | 0.000289 | 3.5398 | 0.002834 | CTRL-AHA; MET-AHA; HPG-CTRL           |
| 363.9966 | 11.441 | 0.000295 | 3.5299 | 0.002891 | HPG-AHA; HPG-CTRL; MET-HPG            |
| 653.1198 | 11.418 | 0.000298 | 3.5251 | 0.002915 | CTRL-AHA; HPG-CTRL; MET-HPG           |

|          |        |          |        |          |                                      |
|----------|--------|----------|--------|----------|--------------------------------------|
| 767.5631 | 11.386 | 0.000303 | 3.5188 | 0.002934 | CTRL-AHA; HPG-CTRL; MET-CTRL         |
| 272.0926 | 11.384 | 0.000303 | 3.5183 | 0.002934 | CTRL-AHA; HPG-AHA; MET-HPG           |
| 257.1434 | 11.38  | 0.000304 | 3.5174 | 0.002934 | CTRL-AHA; HPG-AHA; MET-AHA           |
| 549.4793 | 11.376 | 0.000304 | 3.5167 | 0.002934 | HPG-AHA; HPG-CTRL; MET-HPG           |
| 262.7527 | 11.375 | 0.000304 | 3.5165 | 0.002934 | CTRL-AHA; HPG-CTRL; MET-CTRL         |
| 519.2645 | 11.334 | 0.00031  | 3.5083 | 0.002976 | HPG-AHA; HPG-CTRL; MET-HPG           |
| 652.1088 | 11.327 | 0.000311 | 3.5068 | 0.002976 | HPG-AHA; HPG-CTRL; MET-HPG           |
| 158.0433 | 11.327 | 0.000311 | 3.5068 | 0.002976 | CTRL-AHA; HPG-CTRL; MET-CTRL         |
| 654.8548 | 11.319 | 0.000313 | 3.5051 | 0.002979 | CTRL-AHA; HPG-CTRL; MET-CTRL         |
| 297.0226 | 11.312 | 0.000314 | 3.5036 | 0.002982 | HPG-CTRL; MET-HPG                    |
| 844.6069 | 11.24  | 0.000324 | 3.4891 | 0.003075 | HPG-AHA; HPG-CTRL; MET-HPG           |
| 235.1606 | 11.198 | 0.000331 | 3.4805 | 0.003128 | HPG-AHA; HPG-CTRL; MET-HPG           |
| 664.1059 | 11.191 | 0.000332 | 3.4789 | 0.003131 | CTRL-AHA; HPG-CTRL                   |
| 386.2023 | 11.148 | 0.000339 | 3.4702 | 0.003186 | CTRL-AHA; HPG-CTRL; MET-HPG          |
| 584.9771 | 11.136 | 0.000341 | 3.4677 | 0.003194 | CTRL-AHA; HPG-CTRL; MET-HPG          |
| 242.0614 | 11.125 | 0.000342 | 3.4655 | 0.003194 | HPG-AHA; HPG-CTRL; MET-HPG           |
| 689.1392 | 11.123 | 0.000343 | 3.4651 | 0.003194 | HPG-AHA; HPG-CTRL; MET-HPG           |
| 173.0168 | 11.121 | 0.000343 | 3.4646 | 0.003194 | CTRL-AHA; HPG-CTRL; MET-CTRL         |
| 600.9523 | 11.11  | 0.000345 | 3.4623 | 0.003203 | CTRL-AHA; HPG-CTRL; MET-HPG          |
| 838.281  | 11.09  | 0.000348 | 3.4582 | 0.003224 | CTRL-AHA; HPG-CTRL; MET-HPG          |
| 402.2099 | 11.045 | 0.000356 | 3.4489 | 0.003283 | MET-AHA; MET-CTRL; MET-HPG           |
| 348.8508 | 11.041 | 0.000356 | 3.4482 | 0.003283 | CTRL-AHA; HPG-CTRL; MET-CTRL         |
| 240.1761 | 11.025 | 0.000359 | 3.4448 | 0.003299 | CTRL-AHA; MET-AHA; HPG-CTRL; MET-HPG |
| 703.0635 | 11.02  | 0.00036  | 3.4438 | 0.003299 | CTRL-AHA; HPG-CTRL; MET-HPG          |
| 73.08239 | 10.995 | 0.000364 | 3.4385 | 0.003331 | CTRL-AHA; HPG-CTRL                   |
| 822.015  | 10.951 | 0.000372 | 3.4295 | 0.003392 | CTRL-AHA; HPG-CTRL; MET-HPG          |
| 172.039  | 10.919 | 0.000378 | 3.4228 | 0.003436 | CTRL-AHA; HPG-CTRL; MET-HPG          |
| 144.0621 | 10.903 | 0.000381 | 3.4194 | 0.003455 | CTRL-AHA; MET-AHA; HPG-CTRL; MET-HPG |
| 825.2962 | 10.882 | 0.000385 | 3.4151 | 0.003464 | CTRL-AHA; HPG-CTRL; MET-HPG          |
| 462.7409 | 10.877 | 0.000385 | 3.4141 | 0.003464 | CTRL-AHA; MET-AHA; HPG-CTRL          |
| 479.136  | 10.874 | 0.000386 | 3.4135 | 0.003464 | CTRL-AHA; MET-AHA; HPG-CTRL; MET-HPG |
| 403.0227 | 10.874 | 0.000386 | 3.4133 | 0.003464 | CTRL-AHA; MET-AHA; HPG-CTRL          |
| 184.1483 | 10.871 | 0.000387 | 3.4128 | 0.003464 | CTRL-AHA; MET-AHA; MET-HPG           |
| 219.076  | 10.866 | 0.000388 | 3.4116 | 0.003464 | CTRL-AHA; HPG-CTRL; MET-CTRL         |
| 301.9367 | 10.846 | 0.000391 | 3.4076 | 0.003487 | HPG-AHA; HPG-CTRL; MET-HPG           |
| 238.089  | 10.824 | 0.000395 | 3.4029 | 0.003517 | HPG-AHA; HPG-CTRL                    |
| 329.1077 | 10.813 | 0.000397 | 3.4007 | 0.003526 | HPG-CTRL; MET-HPG                    |
| 469.0622 | 10.8   | 0.0004   | 3.3979 | 0.00354  | HPG-AHA; HPG-CTRL; MET-HPG           |
| 312.1117 | 10.788 | 0.000402 | 3.3954 | 0.003551 | CTRL-AHA; HPG-AHA; MET-CTRL; MET-HPG |
| 973.3348 | 10.755 | 0.000409 | 3.3886 | 0.003599 | CTRL-AHA; MET-AHA; HPG-CTRL          |
| 244.0579 | 10.728 | 0.000414 | 3.3828 | 0.003638 | CTRL-AHA; HPG-CTRL; MET-CTRL         |
| 667.1098 | 10.692 | 0.000421 | 3.3752 | 0.003693 | CTRL-AHA; HPG-CTRL                   |
| 556.2098 | 10.687 | 0.000423 | 3.3741 | 0.003694 | CTRL-AHA; MET-AHA; HPG-CTRL          |
| 478.2439 | 10.681 | 0.000424 | 3.3728 | 0.003696 | MET-AHA; MET-CTRL; MET-HPG           |
| 307.0801 | 10.667 | 0.000427 | 3.37   | 0.003711 | HPG-AHA; HPG-CTRL; MET-HPG           |
| 615.1638 | 10.63  | 0.000434 | 3.3622 | 0.003769 | CTRL-AHA; HPG-CTRL; MET-HPG          |
| 410.924  | 10.598 | 0.000441 | 3.3552 | 0.003821 | HPG-AHA; HPG-CTRL; MET-HPG           |
| 497.1464 | 10.537 | 0.000455 | 3.3422 | 0.003918 | HPG-CTRL; MET-HPG                    |
| 312.9957 | 10.535 | 0.000455 | 3.3419 | 0.003918 | HPG-AHA; HPG-CTRL; MET-HPG           |
| 396.1521 | 10.528 | 0.000457 | 3.3404 | 0.003918 | HPG-AHA; HPG-CTRL; MET-HPG           |
| 532.9632 | 10.527 | 0.000457 | 3.3401 | 0.003918 | HPG-AHA; HPG-CTRL; MET-HPG           |
| 196.0934 | 10.514 | 0.00046  | 3.3374 | 0.003925 | HPG-CTRL; MET-HPG                    |
| 175.1397 | 10.513 | 0.00046  | 3.3372 | 0.003925 | CTRL-AHA; HPG-CTRL; MET-HPG          |
| 174.8918 | 10.499 | 0.000463 | 3.3341 | 0.003944 | CTRL-AHA; HPG-CTRL; MET-CTRL         |
| 72.93538 | 10.477 | 0.000468 | 3.3295 | 0.003976 | CTRL-AHA; HPG-CTRL; MET-HPG          |
| 160.0841 | 10.469 | 0.00047  | 3.3277 | 0.003983 | CTRL-AHA; HPG-CTRL; MET-CTRL         |
| 634.8554 | 10.46  | 0.000472 | 3.3258 | 0.003991 | HPG-CTRL; MET-HPG                    |
| 388.0505 | 10.448 | 0.000475 | 3.3233 | 0.004005 | HPG-CTRL; MET-HPG                    |
| 670.8278 | 10.402 | 0.000486 | 3.3134 | 0.004087 | HPG-CTRL; MET-HPG                    |
| 852.2834 | 10.374 | 0.000493 | 3.3075 | 0.004134 | HPG-AHA; HPG-CTRL; MET-HPG           |
| 193.0313 | 10.322 | 0.000506 | 3.2962 | 0.004233 | CTRL-AHA; HPG-AHA; MET-AHA           |
| 162.0547 | 10.302 | 0.000511 | 3.2918 | 0.004257 | HPG-AHA; HPG-CTRL                    |
| 124.084  | 10.298 | 0.000512 | 3.291  | 0.004257 | CTRL-AHA; HPG-CTRL; MET-HPG          |
| 464.9768 | 10.297 | 0.000512 | 3.2907 | 0.004257 | HPG-AHA; HPG-CTRL; MET-HPG           |
| 498.9219 | 10.29  | 0.000514 | 3.2893 | 0.004261 | HPG-AHA; HPG-CTRL; MET-HPG           |
| 302.077  | 10.277 | 0.000517 | 3.2864 | 0.004279 | CTRL-AHA; HPG-AHA; MET-AHA           |
| 214.0721 | 10.248 | 0.000524 | 3.2803 | 0.00433  | HPG-AHA; MET-CTRL; MET-HPG           |
| 180.0481 | 10.225 | 0.000531 | 3.2752 | 0.004371 | CTRL-AHA; MET-AHA; HPG-CTRL; MET-HPG |
| 487.158  | 10.214 | 0.000534 | 3.2727 | 0.00438  | CTRL-AHA; HPG-CTRL                   |
| 770.5178 | 10.212 | 0.000534 | 3.2724 | 0.00438  | CTRL-AHA; HPG-CTRL                   |
| 858.9457 | 10.204 | 0.000536 | 3.2708 | 0.004386 | CTRL-AHA; HPG-CTRL; MET-HPG          |
| 837.4282 | 10.185 | 0.000541 | 3.2666 | 0.004418 | CTRL-AHA; HPG-AHA                    |
| 618.1666 | 10.152 | 0.00055  | 3.2594 | 0.004482 | CTRL-AHA; HPG-CTRL; MET-HPG          |
| 541.9353 | 10.13  | 0.000556 | 3.2546 | 0.004521 | CTRL-AHA; HPG-CTRL; MET-HPG          |

|          |        |          |        |          |                                      |
|----------|--------|----------|--------|----------|--------------------------------------|
| 112.073  | 10.111 | 0.000562 | 3.2503 | 0.004556 | CTRL-AHA; MET-AHA                    |
| 222.1034 | 10.073 | 0.000573 | 3.242  | 0.004633 | HPG-CTRL; MET-HPG                    |
| 362.0105 | 10.056 | 0.000578 | 3.2384 | 0.004661 | HPG-AHA; HPG-CTRL; MET-HPG           |
| 393.1449 | 9.9636 | 0.000605 | 3.218  | 0.004874 | CTRL-AHA; HPG-CTRL; MET-HPG          |
| 403.0227 | 9.8487 | 0.000642 | 3.1925 | 0.005149 | CTRL-AHA; MET-AHA; HPG-CTRL          |
| 326.1106 | 9.8475 | 0.000642 | 3.1923 | 0.005149 | CTRL-AHA; HPG-CTRL; MET-CTRL         |
| 768.5247 | 9.8376 | 0.000646 | 3.1901 | 0.005163 | CTRL-AHA; HPG-CTRL; MET-CTRL         |
| 570.1556 | 9.804  | 0.000657 | 3.1826 | 0.005241 | CTRL-AHA; MET-AHA                    |
| 769.5601 | 9.795  | 0.00066  | 3.1806 | 0.005254 | CTRL-AHA; HPG-CTRL                   |
| 215.0021 | 9.7886 | 0.000662 | 3.1791 | 0.005255 | CTRL-AHA; HPG-CTRL; MET-HPG          |
| 325.1071 | 9.7858 | 0.000663 | 3.1785 | 0.005255 | CTRL-AHA; HPG-CTRL                   |
| 413.9823 | 9.7518 | 0.000675 | 3.1709 | 0.005325 | HPG-AHA; HPG-CTRL; MET-HPG           |
| 820.5198 | 9.7517 | 0.000675 | 3.1709 | 0.005325 | HPG-AHA; HPG-CTRL; MET-HPG           |
| 853.9633 | 9.7434 | 0.000678 | 3.169  | 0.005336 | CTRL-AHA; HPG-CTRL; MET-HPG          |
| 146.0351 | 9.731  | 0.000682 | 3.1662 | 0.005343 | CTRL-AHA; MET-AHA; HPG-CTRL          |
| 847.295  | 9.7301 | 0.000682 | 3.166  | 0.005343 | HPG-CTRL; MET-HPG                    |
| 144.0447 | 9.728  | 0.000683 | 3.1656 | 0.005343 | CTRL-AHA; MET-AHA; HPG-CTRL; MET-HPG |
| 160.0492 | 9.7095 | 0.00069  | 3.1614 | 0.005383 | CTRL-AHA; HPG-CTRL                   |
| 776.5119 | 9.6648 | 0.000706 | 3.1514 | 0.005496 | CTRL-AHA; HPG-CTRL                   |
| 550.2891 | 9.6603 | 0.000707 | 3.1504 | 0.005497 | CTRL-AHA; HPG-CTRL; MET-HPG          |
| 391.2776 | 9.6297 | 0.000719 | 3.1435 | 0.005573 | CTRL-AHA; HPG-CTRL; MET-CTRL         |
| 58.06367 | 9.6235 | 0.000721 | 3.1421 | 0.005579 | CTRL-AHA; HPG-CTRL; MET-CTRL         |
| 259.0171 | 9.5905 | 0.000733 | 3.1346 | 0.005645 | HPG-AHA; HPG-CTRL; MET-HPG           |
| 364.9927 | 9.5833 | 0.000736 | 3.133  | 0.005645 | HPG-AHA; HPG-CTRL; MET-HPG           |
| 716.5119 | 9.5808 | 0.000737 | 3.1325 | 0.005645 | HPG-AHA; HPG-CTRL; MET-HPG           |
| 227.0281 | 9.5806 | 0.000737 | 3.1324 | 0.005645 | CTRL-AHA; HPG-CTRL; MET-CTRL         |
| 703.4991 | 9.5801 | 0.000737 | 3.1323 | 0.005645 | HPG-CTRL; MET-HPG                    |
| 234.0572 | 9.5598 | 0.000745 | 3.1277 | 0.005693 | HPG-CTRL; MET-HPG                    |
| 851.4414 | 9.5447 | 0.000751 | 3.1243 | 0.005726 | CTRL-AHA; HPG-CTRL; MET-HPG          |
| 516.9894 | 9.5295 | 0.000757 | 3.1208 | 0.005759 | CTRL-AHA; HPG-CTRL                   |
| 353.1575 | 9.4481 | 0.00079  | 3.1023 | 0.005997 | HPG-AHA; HPG-CTRL; MET-HPG           |
| 864.6026 | 9.4204 | 0.000802 | 3.096  | 0.006059 | CTRL-AHA; HPG-CTRL; MET-HPG          |
| 158.9182 | 9.4204 | 0.000802 | 3.096  | 0.006059 | CTRL-AHA; HPG-CTRL; MET-CTRL         |
| 310.0832 | 9.3981 | 0.000811 | 3.0909 | 0.006118 | HPG-CTRL; MET-HPG                    |
| 306.1902 | 9.3842 | 0.000817 | 3.0877 | 0.00615  | HPG-AHA; MET-HPG                     |
| 400.8204 | 9.3432 | 0.000835 | 3.0783 | 0.006271 | CTRL-AHA; HPG-CTRL; MET-HPG          |
| 609.9229 | 9.2968 | 0.000856 | 3.0676 | 0.006414 | CTRL-AHA; HPG-CTRL; MET-HPG          |
| 244.0742 | 9.2746 | 0.000866 | 3.0625 | 0.006476 | CTRL-AHA; HPG-CTRL                   |
| 131.1148 | 9.2639 | 0.000871 | 3.06   | 0.0065   | CTRL-AHA; HPG-AHA; MET-AHA           |
| 673.087  | 9.2541 | 0.000875 | 3.0578 | 0.006515 | HPG-AHA; HPG-CTRL; MET-HPG           |
| 305.1595 | 9.2516 | 0.000877 | 3.0572 | 0.006515 | CTRL-AHA; HPG-CTRL; MET-HPG          |
| 284.3249 | 9.2419 | 0.000881 | 3.055  | 0.006535 | HPG-CTRL; MET-HPG                    |
| 224.0875 | 9.2    | 0.000901 | 3.0453 | 0.006669 | MET-AHA; MET-HPG                     |
| 211.0492 | 9.1508 | 0.000925 | 3.0338 | 0.006833 | CTRL-AHA; HPG-AHA; MET-HPG           |
| 879.9437 | 9.1417 | 0.00093  | 3.0317 | 0.006852 | HPG-CTRL; MET-HPG                    |
| 145.1665 | 9.1053 | 0.000948 | 3.0232 | 0.006973 | CTRL-AHA; HPG-CTRL                   |
| 163.0755 | 9.097  | 0.000952 | 3.0213 | 0.006989 | HPG-AHA; HPG-CTRL; MET-HPG           |
| 449.0029 | 9.088  | 0.000957 | 3.0192 | 0.006998 | CTRL-AHA; HPG-CTRL; MET-HPG          |
| 385.6999 | 9.0871 | 0.000957 | 3.019  | 0.006998 | CTRL-AHA; HPG-CTRL; MET-HPG          |
| 873.6133 | 9.0676 | 0.000967 | 3.0144 | 0.007057 | CTRL-AHA; HPG-CTRL; MET-HPG          |
| 425.973  | 9.0512 | 0.000976 | 3.0106 | 0.007105 | HPG-CTRL; MET-HPG                    |
| 413.157  | 9.0269 | 0.000989 | 3.0049 | 0.007184 | HPG-AHA; HPG-CTRL; MET-HPG           |
| 617.054  | 9.0122 | 0.000997 | 3.0015 | 0.007227 | CTRL-AHA; HPG-CTRL; MET-CTRL         |
| 745.4803 | 8.9494 | 0.001031 | 2.9867 | 0.007462 | HPG-AHA; HPG-CTRL; MET-HPG           |
| 301.0027 | 8.9393 | 0.001037 | 2.9843 | 0.007488 | HPG-AHA; HPG-CTRL; MET-HPG           |
| 439.0972 | 8.9284 | 0.001043 | 2.9817 | 0.007516 | CTRL-AHA; HPG-CTRL; MET-HPG          |
| 235.0703 | 8.9246 | 0.001045 | 2.9808 | 0.007516 | HPG-AHA; MET-HPG                     |
| 455.2181 | 8.9212 | 0.001047 | 2.98   | 0.007516 | HPG-CTRL; MET-HPG                    |
| 252.9821 | 8.8973 | 0.001061 | 2.9744 | 0.007599 | HPG-AHA; HPG-CTRL; MET-HPG           |
| 846.6278 | 8.8772 | 0.001072 | 2.9696 | 0.007645 | HPG-CTRL; MET-HPG                    |
| 774.5159 | 8.8768 | 0.001073 | 2.9696 | 0.007645 | CTRL-AHA; HPG-CTRL; MET-CTRL         |
| 653.1026 | 8.8753 | 0.001074 | 2.9692 | 0.007645 | HPG-AHA; HPG-CTRL; MET-HPG           |
| 824.6287 | 8.8683 | 0.001078 | 2.9675 | 0.007651 | CTRL-AHA; HPG-AHA; MET-HPG           |
| 201.2283 | 8.8639 | 0.00108  | 2.9665 | 0.007651 | CTRL-AHA; HPG-CTRL                   |
| 550.4827 | 8.8629 | 0.001081 | 2.9663 | 0.007651 | HPG-AHA; HPG-CTRL; MET-HPG           |
| 652.9641 | 8.8022 | 0.001117 | 2.9518 | 0.007894 | CTRL-AHA; HPG-CTRL                   |
| 179.9998 | 8.7849 | 0.001128 | 2.9477 | 0.007953 | CTRL-AHA; HPG-CTRL; MET-HPG          |
| 289.0837 | 8.7759 | 0.001134 | 2.9456 | 0.007977 | CTRL-AHA; HPG-CTRL                   |
| 221.1447 | 8.7494 | 0.00115  | 2.9392 | 0.008078 | CTRL-AHA; MET-AHA                    |
| 187.0497 | 8.7293 | 0.001163 | 2.9344 | 0.008152 | HPG-CTRL; MET-CTRL                   |
| 123.0525 | 8.7121 | 0.001174 | 2.9303 | 0.008213 | CTRL-AHA; HPG-CTRL; MET-CTRL         |
| 368.1138 | 8.7041 | 0.001179 | 2.9284 | 0.008234 | HPG-AHA; HPG-CTRL; MET-HPG           |
| 717.5152 | 8.6849 | 0.001192 | 2.9238 | 0.008305 | HPG-AHA; HPG-CTRL; MET-HPG           |
| 421.1276 | 8.6783 | 0.001196 | 2.9222 | 0.008319 | HPG-AHA; HPG-CTRL; MET-HPG           |

|          |        |          |        |          |                              |
|----------|--------|----------|--------|----------|------------------------------|
| 273.116  | 8.671  | 0.001201 | 2.9205 | 0.008337 | CTRL-AHA; MET-AHA; HPG-CTRL  |
| 322.9843 | 8.6607 | 0.001208 | 2.918  | 0.008368 | HPG-AHA; HPG-CTRL; MET-HPG   |
| 330.0629 | 8.6462 | 0.001218 | 2.9145 | 0.008419 | HPG-CTRL; MET-HPG            |
| 319.1122 | 8.6224 | 0.001234 | 2.9088 | 0.008515 | HPG-CTRL; MET-HPG            |
| 551.4893 | 8.5941 | 0.001253 | 2.902  | 0.008619 | HPG-AHA; HPG-CTRL; MET-HPG   |
| 629.4765 | 8.5936 | 0.001254 | 2.9018 | 0.008619 | CTRL-AHA; HPG-CTRL; MET-HPG  |
| 205.0602 | 8.5482 | 0.001286 | 2.8909 | 0.008822 | CTRL-AHA; HPG-CTRL; MET-HPG  |
| 163.0573 | 8.528  | 0.0013   | 2.886  | 0.008888 | CTRL-AHA; HPG-CTRL; MET-CTRL |
| 906.7182 | 8.525  | 0.001303 | 2.8852 | 0.008888 | HPG-CTRL; MET-HPG            |
| 165.963  | 8.5247 | 0.001303 | 2.8852 | 0.008888 | HPG-CTRL                     |
| 110.0061 | 8.5158 | 0.001309 | 2.883  | 0.008906 | CTRL-AHA; HPG-CTRL           |
| 146.0353 | 8.5137 | 0.001311 | 2.8825 | 0.008906 | CTRL-AHA; MET-AHA; HPG-CTRL  |
| 251.0591 | 8.5095 | 0.001314 | 2.8815 | 0.008906 | HPG-AHA; HPG-CTRL; MET-HPG   |
| 177.0467 | 8.5075 | 0.001315 | 2.881  | 0.008906 | MET-AHA; HPG-CTRL; MET-HPG   |
| 466.1048 | 8.488  | 0.00133  | 2.8763 | 0.008969 | CTRL-AHA; HPG-CTRL; MET-HPG  |
| 168.9857 | 8.4879 | 0.00133  | 2.8762 | 0.008969 | CTRL-AHA; HPG-CTRL           |
| 702.0606 | 8.4838 | 0.001333 | 2.8752 | 0.008973 | CTRL-AHA; HPG-CTRL; MET-HPG  |
| 310.1434 | 8.4734 | 0.001341 | 2.8727 | 0.009009 | HPG-AHA; HPG-CTRL            |
| 244.0539 | 8.4627 | 0.001349 | 2.8701 | 0.009039 | CTRL-AHA; HPG-CTRL; MET-CTRL |
| 400.9482 | 8.4607 | 0.00135  | 2.8696 | 0.009039 | CTRL-AHA; HPG-CTRL; MET-CTRL |
| 388.0186 | 8.4192 | 0.001382 | 2.8595 | 0.009235 | CTRL-AHA; HPG-CTRL; MET-HPG  |
| 391.1765 | 8.4074 | 0.001391 | 2.8566 | 0.009279 | HPG-CTRL; MET-HPG            |
| 132.9808 | 8.3998 | 0.001397 | 2.8547 | 0.009302 | CTRL-AHA; HPG-CTRL; MET-CTRL |
| 159.0727 | 8.3676 | 0.001423 | 2.8469 | 0.009454 | CTRL-AHA; HPG-CTRL           |
| 173.1975 | 8.3461 | 0.00144  | 2.8416 | 0.009552 | CTRL-AHA; HPG-CTRL           |
| 244.0542 | 8.3403 | 0.001445 | 2.8402 | 0.009566 | CTRL-AHA; HPG-CTRL; MET-CTRL |
| 430.3803 | 8.2973 | 0.001481 | 2.8296 | 0.009784 | CTRL-AHA; HPG-CTRL           |
| 202.1758 | 8.2828 | 0.001493 | 2.826  | 0.009834 | CTRL-AHA; HPG-CTRL; MET-CTRL |
| 199.0285 | 8.2815 | 0.001494 | 2.8257 | 0.009834 | HPG-CTRL; MET-HPG            |
| 866.2809 | 8.2786 | 0.001496 | 2.825  | 0.009834 | CTRL-AHA; HPG-CTRL; MET-HPG  |
| 325.0439 | 8.2618 | 0.001511 | 2.8208 | 0.009909 | CTRL-AHA; HPG-CTRL; MET-CTRL |
| 859.2768 | 8.2587 | 0.001513 | 2.8201 | 0.009909 | CTRL-AHA; HPG-CTRL; MET-CTRL |
| 779.4702 | 8.248  | 0.001523 | 2.8174 | 0.009951 | CTRL-AHA; HPG-AHA            |
| 361.0966 | 8.2179 | 0.001549 | 2.81   | 0.010105 | CTRL-AHA; HPG-CTRL; MET-CTRL |
| 206.0442 | 8.2092 | 0.001557 | 2.8078 | 0.010137 | CTRL-AHA; MET-AHA; HPG-CTRL  |
| 831.051  | 8.1978 | 0.001567 | 2.805  | 0.010172 | MET-CTRL; MET-HPG            |
| 473.9481 | 8.1967 | 0.001568 | 2.8047 | 0.010172 | CTRL-AHA; HPG-CTRL           |
| 240.1496 | 8.1697 | 0.001592 | 2.798  | 0.010311 | CTRL-AHA; HPG-CTRL           |
| 860.9605 | 8.1616 | 0.0016   | 2.796  | 0.010341 | CTRL-AHA; HPG-CTRL           |
| 376.9129 | 8.1445 | 0.001615 | 2.7917 | 0.010424 | HPG-AHA; HPG-CTRL; MET-HPG   |
| 146.1617 | 8.141  | 0.001619 | 2.7909 | 0.010426 | CTRL-AHA; HPG-CTRL; MET-CTRL |
| 461.1197 | 8.111  | 0.001647 | 2.7834 | 0.010588 | CTRL-AHA; HPG-AHA            |
| 274.119  | 8.106  | 0.001651 | 2.7822 | 0.010599 | CTRL-AHA; MET-AHA; HPG-CTRL  |
| 690.141  | 8.0919 | 0.001665 | 2.7786 | 0.010666 | HPG-AHA; HPG-CTRL; MET-HPG   |
| 629.226  | 8.0775 | 0.001679 | 2.775  | 0.010736 | HPG-CTRL                     |
| 124.0843 | 8.0717 | 0.001684 | 2.7736 | 0.010753 | MET-AHA; MET-HPG             |
| 437.1762 | 8.0522 | 0.001703 | 2.7687 | 0.010855 | HPG-CTRL; MET-HPG            |
| 527.8406 | 8.0457 | 0.00171  | 2.7671 | 0.010876 | CTRL-AHA; HPG-CTRL; MET-CTRL |
| 329.1277 | 8.0271 | 0.001728 | 2.7624 | 0.010974 | CTRL-AHA; HPG-AHA; MET-AHA   |
| 361.1471 | 8.0103 | 0.001745 | 2.7582 | 0.011049 | CTRL-AHA; HPG-CTRL           |
| 127.0115 | 8.0093 | 0.001746 | 2.7579 | 0.011049 | HPG-CTRL; MET-HPG            |
| 116.0316 | 7.9943 | 0.001761 | 2.7541 | 0.011125 | HPG-CTRL; MET-HPG            |
| 158.9182 | 7.9802 | 0.001776 | 2.7506 | 0.011197 | CTRL-AHA; HPG-CTRL; MET-CTRL |
| 466.1411 | 7.9747 | 0.001782 | 2.7492 | 0.011213 | HPG-AHA; HPG-CTRL; MET-HPG   |
| 232.9253 | 7.9323 | 0.001826 | 2.7385 | 0.011472 | HPG-AHA; HPG-CTRL; MET-HPG   |
| 490.808  | 7.9264 | 0.001832 | 2.737  | 0.011482 | CTRL-AHA; HPG-CTRL; MET-CTRL |
| 434.0106 | 7.9248 | 0.001834 | 2.7366 | 0.011482 | HPG-AHA; MET-CTRL; MET-HPG   |
| 247.1262 | 7.9206 | 0.001838 | 2.7355 | 0.01149  | HPG-AHA; HPG-CTRL; MET-HPG   |
| 429.1474 | 7.9073 | 0.001853 | 2.7322 | 0.011559 | CTRL-AHA; MET-AHA            |
| 588.9201 | 7.8859 | 0.001876 | 2.7268 | 0.011672 | HPG-AHA; HPG-CTRL; MET-HPG   |
| 262.1708 | 7.8827 | 0.00188  | 2.726  | 0.011672 | CTRL-AHA; HPG-CTRL           |
| 356.9835 | 7.8817 | 0.001881 | 2.7257 | 0.011672 | HPG-AHA; HPG-CTRL; MET-HPG   |
| 360.1437 | 7.8623 | 0.001902 | 2.7208 | 0.011785 | CTRL-AHA; HPG-CTRL           |
| 487.0758 | 7.8512 | 0.001915 | 2.7179 | 0.011842 | HPG-AHA; HPG-CTRL; MET-HPG   |
| 518.7544 | 7.8339 | 0.001934 | 2.7136 | 0.011941 | CTRL-AHA; HPG-AHA; MET-HPG   |
| 430.1504 | 7.8215 | 0.001948 | 2.7104 | 0.012007 | CTRL-AHA; MET-AHA            |
| 74.09463 | 7.8121 | 0.001959 | 2.708  | 0.012045 | CTRL-AHA; HPG-CTRL           |
| 431.3857 | 7.8103 | 0.001961 | 2.7075 | 0.012045 | CTRL-AHA; HPG-CTRL; MET-CTRL |
| 343.9376 | 7.7958 | 0.001978 | 2.7038 | 0.012128 | CTRL-AHA; HPG-CTRL           |
| 853.0327 | 7.7852 | 0.00199  | 2.7011 | 0.012159 | MET-CTRL; MET-HPG            |
| 158.0433 | 7.7836 | 0.001992 | 2.7007 | 0.012159 | CTRL-AHA; HPG-CTRL; MET-CTRL |
| 296.0037 | 7.779  | 0.001997 | 2.6996 | 0.012159 | CTRL-AHA; HPG-CTRL; MET-HPG  |
| 394.2301 | 7.7782 | 0.001998 | 2.6993 | 0.012159 | CTRL-AHA; HPG-AHA            |
| 214.9126 | 7.7765 | 0.002    | 2.6989 | 0.012159 | HPG-AHA; HPG-CTRL; MET-HPG   |

|          |        |          |        |          |                                      |
|----------|--------|----------|--------|----------|--------------------------------------|
| 456.9886 | 7.774  | 0.002003 | 2.6983 | 0.012159 | MET-AHA; MET-CTRL; MET-HPG           |
| 430.3806 | 7.7629 | 0.002016 | 2.6954 | 0.012202 | CTRL-AHA; HPG-CTRL                   |
| 293.0748 | 7.7622 | 0.002017 | 2.6952 | 0.012202 | HPG-AHA; HPG-CTRL; MET-HPG           |
| 860.6283 | 7.7255 | 0.002061 | 2.6859 | 0.012448 | CTRL-AHA; HPG-CTRL                   |
| 204.0384 | 7.7145 | 0.002075 | 2.683  | 0.012505 | CTRL-AHA; HPG-CTRL; MET-CTRL         |
| 209.0168 | 7.7121 | 0.002078 | 2.6824 | 0.012505 | CTRL-AHA; HPG-CTRL; MET-CTRL         |
| 194.9619 | 7.6857 | 0.002111 | 2.6756 | 0.012667 | HPG-AHA; HPG-CTRL; MET-HPG           |
| 566.7092 | 7.683  | 0.002114 | 2.6749 | 0.012667 | CTRL-AHA; HPG-CTRL; MET-CTRL         |
| 425.1171 | 7.6818 | 0.002115 | 2.6746 | 0.012667 | HPG-CTRL                             |
| 134.9776 | 7.6617 | 0.002141 | 2.6695 | 0.012789 | CTRL-AHA; HPG-CTRL; MET-CTRL         |
| 239.081  | 7.66   | 0.002143 | 2.669  | 0.012789 | CTRL-AHA; MET-AHA; HPG-CTRL; MET-HPG |
| 824.9636 | 7.6163 | 0.002199 | 2.6577 | 0.013092 | HPG-AHA; MET-HPG                     |
| 391.2776 | 7.615  | 0.002201 | 2.6574 | 0.013092 | CTRL-AHA; HPG-CTRL; MET-HPG          |
| 323.1479 | 7.61   | 0.002208 | 2.6561 | 0.013109 | CTRL-AHA; HPG-CTRL                   |
| 412.0284 | 7.582  | 0.002245 | 2.6489 | 0.013308 | CTRL-AHA; HPG-AHA; MET-CTRL          |
| 133.9249 | 7.554  | 0.002283 | 2.6416 | 0.01351  | HPG-AHA; HPG-CTRL; MET-HPG           |
| 405.9614 | 7.5435 | 0.002297 | 2.6389 | 0.013573 | CTRL-AHA; HPG-CTRL                   |
| 59.05887 | 7.5298 | 0.002316 | 2.6353 | 0.013662 | CTRL-AHA; HPG-CTRL                   |
| 308.0853 | 7.5263 | 0.002321 | 2.6344 | 0.013668 | HPG-CTRL; MET-HPG                    |
| 194.0271 | 7.5045 | 0.002351 | 2.6287 | 0.013825 | CTRL-AHA; MET-AHA                    |
| 225.1553 | 7.4953 | 0.002364 | 2.6263 | 0.013879 | CTRL-AHA; HPG-AHA; MET-AHA           |
| 104.0507 | 7.4657 | 0.002407 | 2.6186 | 0.014096 | CTRL-AHA; MET-AHA; HPG-CTRL; MET-HPG |
| 724.0422 | 7.4618 | 0.002412 | 2.6175 | 0.014096 | HPG-CTRL; MET-HPG                    |
| 142.0287 | 7.4614 | 0.002413 | 2.6174 | 0.014096 | HPG-CTRL; MET-HPG                    |
| 683.0647 | 7.4522 | 0.002426 | 2.615  | 0.014151 | HPG-CTRL; MET-HPG                    |
| 216.9555 | 7.4481 | 0.002432 | 2.614  | 0.014162 | HPG-CTRL; MET-HPG                    |
| 134.0414 | 7.433  | 0.002455 | 2.61   | 0.014269 | MET-HPG                              |
| 854.295  | 7.3411 | 0.002595 | 2.5859 | 0.015061 | CTRL-AHA; HPG-CTRL                   |
| 200.0322 | 7.3327 | 0.002608 | 2.5836 | 0.015113 | CTRL-AHA; HPG-CTRL                   |
| 724.9814 | 7.322  | 0.002625 | 2.5808 | 0.015187 | HPG-AHA; HPG-CTRL; MET-HPG           |
| 314.1171 | 7.313  | 0.00264  | 2.5784 | 0.015234 | CTRL-AHA; HPG-AHA; MET-AHA           |
| 513.0579 | 7.3117 | 0.002642 | 2.5781 | 0.015234 | CTRL-AHA; HPG-AHA                    |
| 300.2834 | 7.3074 | 0.002649 | 2.577  | 0.015249 | CTRL-AHA; HPG-CTRL; MET-CTRL         |
| 871.2655 | 7.3043 | 0.002654 | 2.5761 | 0.015253 | CTRL-AHA; HPG-CTRL                   |
| 260.7554 | 7.2806 | 0.002692 | 2.5699 | 0.01545  | CTRL-AHA; HPG-CTRL; MET-CTRL         |
| 428.3645 | 7.275  | 0.002702 | 2.5684 | 0.015479 | CTRL-AHA; HPG-CTRL                   |
| 395.152  | 7.2477 | 0.002747 | 2.5611 | 0.015692 | HPG-AHA; HPG-CTRL; MET-HPG           |
| 543.9308 | 7.2473 | 0.002748 | 2.561  | 0.015692 | HPG-AHA; HPG-CTRL; MET-HPG           |
| 290.9377 | 7.2383 | 0.002763 | 2.5586 | 0.015753 | HPG-AHA; HPG-CTRL; MET-HPG           |
| 395.2331 | 7.231  | 0.002775 | 2.5567 | 0.015799 | CTRL-AHA; HPG-AHA                    |
| 291.9004 | 7.2199 | 0.002794 | 2.5537 | 0.015882 | CTRL-AHA; HPG-CTRL                   |
| 362.9962 | 7.2122 | 0.002808 | 2.5517 | 0.015897 | CTRL-AHA; HPG-CTRL; MET-CTRL         |
| 866.9587 | 7.2114 | 0.002809 | 2.5515 | 0.015897 | CTRL-AHA; HPG-CTRL                   |
| 432.0961 | 7.2088 | 0.002813 | 2.5508 | 0.015897 | CTRL-AHA; HPG-AHA; MET-AHA           |
| 531.7691 | 7.2052 | 0.00282  | 2.5498 | 0.015897 | HPG-CTRL; MET-HPG                    |
| 974.3374 | 7.2048 | 0.00282  | 2.5497 | 0.015897 | CTRL-AHA; MET-AHA; HPG-CTRL          |
| 764.4486 | 7.2029 | 0.002824 | 2.5492 | 0.015897 | CTRL-AHA; HPG-CTRL; MET-CTRL         |
| 573.8006 | 7.1893 | 0.002847 | 2.5456 | 0.016004 | HPG-AHA; MET-HPG                     |
| 206.0948 | 7.1613 | 0.002897 | 2.5381 | 0.016249 | CTRL-AHA; HPG-CTRL                   |
| 229.9019 | 7.1595 | 0.0029   | 2.5376 | 0.016249 | CTRL-AHA; HPG-CTRL                   |
| 172.9523 | 7.1376 | 0.002939 | 2.5318 | 0.01643  | CTRL-AHA; MET-AHA; HPG-CTRL; MET-HPG |
| 177.1199 | 7.1365 | 0.002941 | 2.5314 | 0.01643  | MET-AHA; MET-HPG                     |
| 867.957  | 7.1339 | 0.002946 | 2.5308 | 0.016431 | CTRL-AHA; HPG-CTRL                   |
| 765.5662 | 7.1218 | 0.002968 | 2.5275 | 0.016527 | CTRL-AHA; HPG-CTRL                   |
| 860.2959 | 7.1187 | 0.002974 | 2.5267 | 0.016527 | CTRL-AHA; HPG-CTRL; MET-CTRL         |
| 309.128  | 7.1146 | 0.002981 | 2.5256 | 0.016527 | HPG-AHA; HPG-CTRL; MET-HPG           |
| 230.1819 | 7.1144 | 0.002982 | 2.5255 | 0.016527 | CTRL-AHA; HPG-AHA                    |
| 160.0896 | 7.1065 | 0.002996 | 2.5234 | 0.016576 | CTRL-AHA; HPG-CTRL                   |
| 431.1484 | 7.1045 | 0.003    | 2.5229 | 0.016576 | CTRL-AHA; MET-AHA; MET-HPG           |
| 715.4408 | 7.0583 | 0.003087 | 2.5104 | 0.017032 | HPG-AHA; HPG-CTRL; MET-HPG           |
| 128.1403 | 7.0427 | 0.003117 | 2.5062 | 0.017171 | CTRL-AHA; HPG-CTRL                   |
| 807.2878 | 7.0365 | 0.003129 | 2.5046 | 0.01721  | CTRL-AHA; MET-AHA; HPG-CTRL          |
| 619.0516 | 7.0231 | 0.003155 | 2.5009 | 0.01731  | CTRL-AHA; HPG-CTRL; MET-CTRL         |
| 229.9018 | 7.0223 | 0.003157 | 2.5007 | 0.01731  | CTRL-AHA; HPG-CTRL                   |
| 867.6254 | 7.0167 | 0.003168 | 2.4992 | 0.017344 | CTRL-AHA; HPG-CTRL; MET-CTRL         |
| 225.0264 | 7.0129 | 0.003176 | 2.4982 | 0.017358 | MET-AHA; HPG-CTRL; MET-HPG           |
| 466.105  | 7.0025 | 0.003196 | 2.4954 | 0.017445 | HPG-CTRL; MET-HPG                    |
| 74.92914 | 6.9736 | 0.003254 | 2.4875 | 0.017735 | CTRL-AHA; HPG-CTRL                   |
| 358.0612 | 6.9681 | 0.003265 | 2.4861 | 0.017768 | HPG-CTRL; MET-HPG                    |
| 625.2765 | 6.9547 | 0.003293 | 2.4824 | 0.017873 | CTRL-AHA; HPG-AHA; MET-HPG           |
| 858.6098 | 6.9539 | 0.003295 | 2.4822 | 0.017873 | CTRL-AHA; HPG-CTRL; MET-HPG          |
| 429.9569 | 6.9459 | 0.003311 | 2.48   | 0.017935 | CTRL-AHA; HPG-CTRL; MET-HPG          |
| 170.0081 | 6.9145 | 0.003377 | 2.4715 | 0.018263 | CTRL-AHA; MET-AHA                    |
| 430.0974 | 6.9109 | 0.003385 | 2.4705 | 0.018277 | CTRL-AHA; HPG-AHA; MET-AHA           |

|          |        |          |        |          |                                      |
|----------|--------|----------|--------|----------|--------------------------------------|
| 105.9511 | 6.8796 | 0.003452 | 2.462  | 0.01859  | CTRL-AHA; HPG-CTRL                   |
| 188.8759 | 6.8767 | 0.003458 | 2.4612 | 0.01859  | CTRL-AHA; HPG-CTRL                   |
| 687.0257 | 6.8767 | 0.003458 | 2.4612 | 0.01859  | HPG-AHA; HPG-CTRL; MET-HPG           |
| 263.1549 | 6.8698 | 0.003473 | 2.4593 | 0.018634 | CTRL-AHA; MET-AHA                    |
| 175.1152 | 6.8681 | 0.003477 | 2.4588 | 0.018634 | MET-HPG                              |
| 172.1847 | 6.8655 | 0.003482 | 2.4581 | 0.018637 | HPG-CTRL                             |
| 338.9579 | 6.8398 | 0.003539 | 2.4511 | 0.018911 | HPG-AHA; HPG-CTRL; MET-HPG           |
| 336.6841 | 6.8357 | 0.003549 | 2.45   | 0.018911 | CTRL-AHA; HPG-CTRL; MET-CTRL         |
| 135.9737 | 6.8352 | 0.00355  | 2.4498 | 0.018911 | CTRL-AHA; MET-AHA                    |
| 243.0486 | 6.8062 | 0.003615 | 2.4419 | 0.019232 | HPG-AHA; MET-HPG                     |
| 589.5096 | 6.7923 | 0.003647 | 2.4381 | 0.019373 | HPG-CTRL; MET-HPG                    |
| 150.9762 | 6.7839 | 0.003667 | 2.4357 | 0.019448 | CTRL-AHA; HPG-CTRL                   |
| 176.0365 | 6.7742 | 0.003689 | 2.4331 | 0.019539 | CTRL-AHA                             |
| 851.2839 | 6.7667 | 0.003707 | 2.431  | 0.019603 | CTRL-AHA; HPG-CTRL; MET-HPG          |
| 811.2944 | 6.7605 | 0.003721 | 2.4293 | 0.019651 | HPG-AHA; HPG-CTRL; MET-HPG           |
| 608.078  | 6.7466 | 0.003754 | 2.4255 | 0.019797 | CTRL-AHA; HPG-CTRL                   |
| 132.115  | 6.7437 | 0.003761 | 2.4247 | 0.019802 | HPG-AHA; HPG-CTRL                    |
| 434.9663 | 6.74   | 0.00377  | 2.4236 | 0.019802 | MET-CTRL; MET-HPG                    |
| 146.044  | 6.7392 | 0.003772 | 2.4234 | 0.019802 | CTRL-AHA; HPG-CTRL; MET-HPG          |
| 429.2329 | 6.733  | 0.003787 | 2.4217 | 0.019852 | CTRL-AHA; MET-AHA; HPG-CTRL; MET-HPG |
| 420.9916 | 6.7271 | 0.003801 | 2.4201 | 0.019897 | HPG-CTRL; MET-HPG                    |
| 671.06   | 6.7193 | 0.00382  | 2.4179 | 0.019942 | HPG-CTRL; MET-HPG                    |
| 454.9601 | 6.719  | 0.003821 | 2.4178 | 0.019942 | HPG-CTRL                             |
| 418.2052 | 6.6971 | 0.003875 | 2.4118 | 0.020192 | MET-AHA; MET-CTRL; MET-HPG           |
| 134.1122 | 6.6858 | 0.003903 | 2.4086 | 0.020294 | MET-AHA; MET-HPG                     |
| 252.0098 | 6.6846 | 0.003906 | 2.4083 | 0.020294 | CTRL-AHA; HPG-AHA                    |
| 58.06368 | 6.6513 | 0.00399  | 2.3991 | 0.020701 | CTRL-AHA; HPG-CTRL; MET-CTRL         |
| 429.233  | 6.6463 | 0.004002 | 2.3977 | 0.020737 | CTRL-AHA; HPG-CTRL                   |
| 253.0887 | 6.6434 | 0.00401  | 2.3969 | 0.020745 | HPG-CTRL; MET-HPG                    |
| 207.0727 | 6.6347 | 0.004032 | 2.3944 | 0.020832 | CTRL-AHA; HPG-CTRL                   |
| 168.071  | 6.6213 | 0.004067 | 2.3907 | 0.020982 | HPG-CTRL; MET-HPG                    |
| 177.0464 | 6.6161 | 0.004081 | 2.3893 | 0.020997 | HPG-CTRL; MET-HPG                    |
| 337.9747 | 6.6157 | 0.004082 | 2.3891 | 0.020997 | CTRL-AHA; HPG-CTRL                   |
| 825.9633 | 6.6079 | 0.004102 | 2.387  | 0.021071 | HPG-CTRL; MET-HPG                    |
| 225.1213 | 6.5839 | 0.004166 | 2.3803 | 0.021367 | CTRL-AHA; HPG-CTRL                   |
| 844.9418 | 6.5756 | 0.004188 | 2.378  | 0.021452 | HPG-CTRL; MET-HPG                    |
| 294.8486 | 6.5242 | 0.00433  | 2.3636 | 0.022143 | CTRL-AHA; HPG-CTRL; MET-CTRL         |
| 323.0838 | 6.5126 | 0.004362 | 2.3603 | 0.022277 | CTRL-AHA                             |
| 119.0858 | 6.5077 | 0.004376 | 2.3589 | 0.02229  | CTRL-AHA; HPG-CTRL; MET-CTRL         |
| 98.98167 | 6.5074 | 0.004377 | 2.3588 | 0.02229  | HPG-CTRL                             |
| 237.9869 | 6.4964 | 0.004408 | 2.3558 | 0.022417 | CTRL-AHA                             |
| 206.0625 | 6.4934 | 0.004417 | 2.3549 | 0.022428 | CTRL-AHA; HPG-CTRL; MET-HPG          |
| 414.8051 | 6.4898 | 0.004427 | 2.3539 | 0.022449 | CTRL-AHA; MET-CTRL                   |
| 255.1402 | 6.4651 | 0.004499 | 2.3469 | 0.02278  | HPG-AHA; MET-HPG                     |
| 88.03718 | 6.4557 | 0.004526 | 2.3443 | 0.022886 | MET-HPG                              |
| 410.8482 | 6.4498 | 0.004543 | 2.3426 | 0.022942 | CTRL-AHA; HPG-CTRL                   |
| 538.7737 | 6.4131 | 0.004653 | 2.3322 | 0.023444 | HPG-AHA; MET-HPG                     |
| 825.6314 | 6.4122 | 0.004656 | 2.332  | 0.023444 | HPG-AHA; HPG-CTRL; MET-HPG           |
| 124.0029 | 6.408  | 0.004669 | 2.3308 | 0.023475 | CTRL-AHA; HPG-CTRL                   |
| 379.1769 | 6.4037 | 0.004682 | 2.3296 | 0.023488 | HPG-AHA; HPG-CTRL; MET-HPG           |
| 115.0916 | 6.3995 | 0.004695 | 2.3284 | 0.023488 | HPG-AHA; HPG-CTRL                    |
| 135.0445 | 6.3992 | 0.004696 | 2.3283 | 0.023488 | HPG-CTRL; MET-HPG                    |
| 334.1182 | 6.3986 | 0.004698 | 2.3281 | 0.023488 | HPG-AHA; HPG-CTRL; MET-HPG           |
| 286.0806 | 6.3892 | 0.004727 | 2.3255 | 0.023599 | CTRL-AHA; MET-AHA                    |
| 871.5969 | 6.3862 | 0.004736 | 2.3246 | 0.023613 | HPG-CTRL                             |
| 74.09462 | 6.3814 | 0.004751 | 2.3233 | 0.023653 | CTRL-AHA; HPG-CTRL                   |
| 538.8754 | 6.3772 | 0.004764 | 2.322  | 0.023686 | HPG-CTRL; MET-HPG                    |
| 285.1212 | 6.3642 | 0.004805 | 2.3184 | 0.023856 | CTRL-AHA; HPG-AHA; MET-AHA           |
| 286.1484 | 6.3367 | 0.004892 | 2.3105 | 0.024256 | CTRL-AHA; HPG-AHA                    |
| 808.2883 | 6.3344 | 0.004899 | 2.3099 | 0.024258 | CTRL-AHA; HPG-CTRL                   |
| 225.1195 | 6.3304 | 0.004912 | 2.3087 | 0.024288 | CTRL-AHA; HPG-CTRL                   |
| 550.2711 | 6.3247 | 0.00493  | 2.3071 | 0.024346 | HPG-CTRL; MET-HPG                    |
| 231.1849 | 6.3224 | 0.004938 | 2.3065 | 0.024349 | CTRL-AHA; HPG-AHA; MET-AHA           |
| 269.1049 | 6.3126 | 0.00497  | 2.3037 | 0.024473 | CTRL-AHA                             |
| 85.0264  | 6.2957 | 0.005025 | 2.2988 | 0.024712 | CTRL-AHA; HPG-CTRL                   |
| 132.099  | 6.2884 | 0.00505  | 2.2967 | 0.024798 | HPG-CTRL; MET-HPG                    |
| 587.0269 | 6.2735 | 0.0051   | 2.2925 | 0.025008 | CTRL-AHA; MET-AHA                    |
| 304.136  | 6.2709 | 0.005108 | 2.2917 | 0.025015 | HPG-CTRL; MET-HPG                    |
| 578.9677 | 6.2672 | 0.005121 | 2.2907 | 0.025042 | HPG-CTRL; MET-HPG                    |
| 124.9612 | 6.2639 | 0.005132 | 2.2897 | 0.025063 | HPG-CTRL; MET-HPG                    |
| 448.1318 | 6.2571 | 0.005155 | 2.2878 | 0.025141 | CTRL-AHA                             |
| 105.9511 | 6.2415 | 0.005208 | 2.2833 | 0.025367 | HPG-CTRL; MET-HPG                    |
| 404.1343 | 6.2015 | 0.005348 | 2.2718 | 0.026013 | CTRL-AHA; MET-AHA                    |
| 236.0361 | 6.1694 | 0.005463 | 2.2625 | 0.026537 | HPG-AHA; HPG-CTRL; MET-HPG           |

|          |        |          |        |          |                              |
|----------|--------|----------|--------|----------|------------------------------|
| 133.5581 | 6.1606 | 0.005495 | 2.26   | 0.026656 | HPG-AHA; HPG-CTRL            |
| 845.959  | 6.1405 | 0.005569 | 2.2542 | 0.026979 | HPG-AHA; MET-HPG             |
| 319.1924 | 6.1059 | 0.005699 | 2.2442 | 0.02754  | HPG-AHA; HPG-CTRL; MET-HPG   |
| 331.0301 | 6.105  | 0.005703 | 2.2439 | 0.02754  | HPG-CTRL; MET-HPG            |
| 402.1262 | 6.1036 | 0.005708 | 2.2435 | 0.02754  | HPG-CTRL; MET-HPG            |
| 691.1376 | 6.085  | 0.00578  | 2.2381 | 0.027847 | HPG-CTRL; MET-HPG            |
| 254.0082 | 6.0664 | 0.005852 | 2.2327 | 0.028157 | CTRL-AHA; HPG-AHA            |
| 196.9568 | 6.062  | 0.005869 | 2.2314 | 0.028203 | HPG-CTRL                     |
| 808.7886 | 6.0434 | 0.005943 | 2.226  | 0.028518 | CTRL-AHA; HPG-CTRL           |
| 173.0171 | 6.0409 | 0.005953 | 2.2253 | 0.028529 | CTRL-AHA; HPG-CTRL           |
| 807.7887 | 6.0319 | 0.005989 | 2.2226 | 0.028662 | CTRL-AHA; HPG-CTRL           |
| 132.099  | 6.021  | 0.006033 | 2.2195 | 0.028835 | HPG-CTRL; MET-HPG            |
| 190.0086 | 6.0008 | 0.006116 | 2.2136 | 0.02919  | CTRL-AHA; HPG-CTRL           |
| 424.1181 | 5.997  | 0.006131 | 2.2124 | 0.029203 | HPG-AHA; MET-HPG             |
| 258.8941 | 5.9963 | 0.006135 | 2.2122 | 0.029203 | HPG-CTRL                     |
| 176.099  | 5.9929 | 0.006149 | 2.2112 | 0.02923  | HPG-AHA; HPG-CTRL; MET-HPG   |
| 730.527  | 5.9873 | 0.006172 | 2.2096 | 0.029277 | HPG-AHA; HPG-CTRL; MET-HPG   |
| 719.5306 | 5.9863 | 0.006176 | 2.2093 | 0.029277 | HPG-CTRL; MET-HPG            |
| 401.952  | 5.9846 | 0.006183 | 2.2088 | 0.029277 | HPG-AHA; HPG-CTRL; MET-HPG   |
| 222.1034 | 5.975  | 0.006223 | 2.206  | 0.029388 | HPG-CTRL; MET-HPG            |
| 112.0188 | 5.9745 | 0.006225 | 2.2058 | 0.029388 | HPG-AHA; HPG-CTRL            |
| 219.0232 | 5.9731 | 0.006231 | 2.2054 | 0.029388 | CTRL-AHA; HPG-CTRL; MET-CTRL |
| 866.6183 | 5.9618 | 0.006279 | 2.2021 | 0.029575 | CTRL-AHA; HPG-CTRL           |
| 176.8903 | 5.9594 | 0.006289 | 2.2014 | 0.029584 | CTRL-AHA; HPG-CTRL           |
| 290.1314 | 5.955  | 0.006308 | 2.2001 | 0.029633 | MET-CTRL; MET-HPG            |
| 528.754  | 5.9517 | 0.006322 | 2.1991 | 0.02966  | CTRL-AHA; HPG-CTRL           |
| 515.1381 | 5.9412 | 0.006367 | 2.1961 | 0.029833 | CTRL-AHA; HPG-CTRL           |
| 338.6813 | 5.9277 | 0.006426 | 2.1921 | 0.030068 | CTRL-AHA; HPG-CTRL           |
| 338.1318 | 5.9222 | 0.00645  | 2.1905 | 0.03012  | HPG-AHA; HPG-CTRL; MET-HPG   |
| 712.2757 | 5.9213 | 0.006454 | 2.1902 | 0.03012  | CTRL-AHA; HPG-CTRL           |
| 150.0708 | 5.9171 | 0.006472 | 2.189  | 0.030165 | MET-AHA; MET-HPG             |
| 731.5305 | 5.9095 | 0.006505 | 2.1867 | 0.030262 | HPG-AHA; MET-HPG             |
| 268.1257 | 5.9086 | 0.00651  | 2.1865 | 0.030262 | CTRL-AHA; MET-AHA            |
| 168.0694 | 5.8985 | 0.006554 | 2.1835 | 0.03043  | HPG-CTRL; MET-HPG            |
| 277.0398 | 5.8855 | 0.006613 | 2.1796 | 0.030661 | CTRL-AHA; HPG-CTRL; MET-CTRL |
| 143.0364 | 5.8834 | 0.006622 | 2.179  | 0.030665 | HPG-AHA; HPG-CTRL            |
| 132.0992 | 5.8718 | 0.006675 | 2.1756 | 0.030869 | CTRL-AHA; HPG-AHA            |
| 268.1029 | 5.8621 | 0.006719 | 2.1727 | 0.031032 | CTRL-AHA; HPG-CTRL           |
| 428.3649 | 5.858  | 0.006737 | 2.1715 | 0.031078 | CTRL-AHA; HPG-CTRL           |
| 187.1765 | 5.8493 | 0.006777 | 2.1689 | 0.031223 | CTRL-AHA; MET-AHA            |
| 235.9886 | 5.8368 | 0.006836 | 2.1652 | 0.031451 | CTRL-AHA; HPG-CTRL; MET-CTRL |
| 362.9939 | 5.8336 | 0.006851 | 2.1643 | 0.031479 | HPG-CTRL; MET-HPG            |
| 500.0828 | 5.8142 | 0.006942 | 2.1585 | 0.031828 | HPG-CTRL                     |
| 170.9538 | 5.8137 | 0.006944 | 2.1584 | 0.031828 | HPG-CTRL; MET-HPG            |
| 272.0958 | 5.8033 | 0.006994 | 2.1553 | 0.032016 | CTRL-AHA; HPG-AHA; MET-AHA   |
| 345.0416 | 5.7982 | 0.007019 | 2.1537 | 0.032087 | HPG-CTRL; MET-HPG            |
| 344.7354 | 5.7954 | 0.007032 | 2.1529 | 0.032106 | HPG-CTRL; MET-HPG            |
| 538.1633 | 5.7778 | 0.007117 | 2.1477 | 0.032454 | CTRL-AHA                     |
| 311.1792 | 5.769  | 0.00716  | 2.1451 | 0.03261  | HPG-CTRL; MET-HPG            |
| 111.089  | 5.7651 | 0.007179 | 2.1439 | 0.032655 | HPG-AHA; HPG-CTRL            |
| 771.5029 | 5.7595 | 0.007207 | 2.1422 | 0.032739 | HPG-CTRL; MET-HPG            |
| 625.7776 | 5.7558 | 0.007226 | 2.1411 | 0.032756 | HPG-AHA                      |
| 734.8668 | 5.7551 | 0.007229 | 2.1409 | 0.032756 | CTRL-AHA                     |
| 514.135  | 5.7439 | 0.007285 | 2.1376 | 0.032966 | CTRL-AHA; HPG-CTRL           |
| 865.2857 | 5.7367 | 0.007321 | 2.1354 | 0.033089 | CTRL-AHA; HPG-CTRL           |
| 213.0117 | 5.733  | 0.00734  | 2.1343 | 0.033108 | HPG-CTRL; MET-HPG            |
| 810.6258 | 5.7322 | 0.007344 | 2.1341 | 0.033108 | HPG-AHA; MET-HPG             |
| 362.1484 | 5.7298 | 0.007356 | 2.1333 | 0.033122 | HPG-CTRL                     |
| 311.0342 | 5.7271 | 0.00737  | 2.1326 | 0.03314  | CTRL-AHA; HPG-CTRL           |
| 482.2554 | 5.7246 | 0.007383 | 2.1318 | 0.033156 | MET-HPG                      |
| 638.1492 | 5.7056 | 0.00748  | 2.1261 | 0.033552 | HPG-CTRL                     |
| 405.1192 | 5.6865 | 0.007579 | 2.1204 | 0.033954 | CTRL-AHA; HPG-CTRL           |
| 170.0774 | 5.6778 | 0.007625 | 2.1178 | 0.034117 | CTRL-AHA; MET-AHA            |
| 720.5337 | 5.6597 | 0.007721 | 2.1123 | 0.034504 | HPG-CTRL; MET-HPG            |
| 615.459  | 5.6502 | 0.007772 | 2.1095 | 0.034688 | CTRL-AHA; HPG-CTRL           |
| 492.1201 | 5.6347 | 0.007857 | 2.1048 | 0.035022 | CTRL-AHA; HPG-CTRL; MET-CTRL |
| 381.1375 | 5.6258 | 0.007905 | 2.1021 | 0.035192 | HPG-AHA; HPG-CTRL; MET-HPG   |
| 766.4085 | 5.6198 | 0.007938 | 2.1003 | 0.035271 | HPG-AHA; MET-HPG             |
| 381.0165 | 5.619  | 0.007942 | 2.1001 | 0.035271 | CTRL-AHA; HPG-CTRL           |
| 274.1349 | 5.6116 | 0.007984 | 2.0978 | 0.035412 | HPG-AHA; HPG-CTRL; MET-HPG   |
| 140.0496 | 5.5969 | 0.008066 | 2.0934 | 0.03573  | MET-HPG                      |
| 524.049  | 5.5886 | 0.008113 | 2.0908 | 0.035858 | CTRL-AHA; MET-CTRL           |
| 276.103  | 5.5882 | 0.008114 | 2.0907 | 0.035858 | CTRL-AHA; HPG-CTRL           |
| 236.0651 | 5.5844 | 0.008136 | 2.0896 | 0.035885 | CTRL-AHA; HPG-AHA            |



|          |        |          |        |          |                              |
|----------|--------|----------|--------|----------|------------------------------|
| 362.0085 | 5.5836 | 0.008141 | 2.0893 | 0.035885 | HPG-CTRL; MET-HPG            |
| 342.2057 | 5.5768 | 0.00818  | 2.0873 | 0.036012 | CTRL-AHA; MET-AHA            |
| 338.096  | 5.5705 | 0.008215 | 2.0854 | 0.036125 | HPG-CTRL; MET-HPG            |
| 149.9895 | 5.5688 | 0.008225 | 2.0848 | 0.036125 | HPG-CTRL                     |
| 495.8513 | 5.566  | 0.008241 | 2.084  | 0.036151 | CTRL-AHA; HPG-CTRL           |
| 410.9241 | 5.5629 | 0.00826  | 2.083  | 0.036186 | HPG-CTRL; MET-HPG            |
| 375.0693 | 5.5601 | 0.008275 | 2.0822 | 0.036211 | HPG-CTRL; MET-HPG            |
| 156.023  | 5.5567 | 0.008295 | 2.0812 | 0.036211 | HPG-CTRL; MET-HPG            |
| 851.6175 | 5.5566 | 0.008296 | 2.0812 | 0.036211 | HPG-CTRL                     |
| 864.269  | 5.5541 | 0.00831  | 2.0804 | 0.03623  | HPG-AHA; HPG-CTRL            |
| 701.4238 | 5.5453 | 0.008362 | 2.0777 | 0.036388 | HPG-AHA; MET-HPG             |
| 347.1615 | 5.5444 | 0.008367 | 2.0774 | 0.036388 | CTRL-AHA; HPG-CTRL           |
| 211.1435 | 5.5387 | 0.0084   | 2.0757 | 0.036489 | MET-HPG                      |
| 245.1557 | 5.5301 | 0.008451 | 2.0731 | 0.036665 | HPG-AHA; HPG-CTRL            |
| 342.1334 | 5.5275 | 0.008466 | 2.0723 | 0.036687 | CTRL-AHA; HPG-CTRL           |
| 586.3255 | 5.525  | 0.008481 | 2.0715 | 0.036708 | MET-CTRL; MET-HPG            |
| 182.0407 | 5.5103 | 0.008569 | 2.0671 | 0.037043 | HPG-CTRL; MET-HPG            |
| 318.1954 | 5.5071 | 0.008588 | 2.0661 | 0.037077 | MET-AHA; MET-CTRL            |
| 145.0714 | 5.5055 | 0.008598 | 2.0656 | 0.037077 | HPG-CTRL; MET-CTRL           |
| 718.527  | 5.497  | 0.008649 | 2.063  | 0.037254 | HPG-CTRL; MET-HPG            |
| 536.264  | 5.4936 | 0.00867  | 2.062  | 0.0373   | HPG-CTRL                     |
| 210.1431 | 5.4867 | 0.008713 | 2.0599 | 0.037436 | HPG-CTRL; MET-HPG            |
| 267.0563 | 5.4762 | 0.008777 | 2.0567 | 0.037608 | HPG-AHA; MET-HPG             |
| 413.9823 | 5.4744 | 0.008788 | 2.0561 | 0.037608 | CTRL-AHA; HPG-CTRL           |
| 136.9279 | 5.4739 | 0.008791 | 2.056  | 0.037608 | CTRL-AHA; HPG-CTRL           |
| 231.8991 | 5.4734 | 0.008794 | 2.0558 | 0.037608 | CTRL-AHA; HPG-CTRL           |
| 589.0331 | 5.4705 | 0.008812 | 2.0549 | 0.037637 | CTRL-AHA; HPG-CTRL           |
| 439.0626 | 5.4673 | 0.008832 | 2.0539 | 0.037649 | CTRL-AHA; HPG-CTRL           |
| 269.1444 | 5.4667 | 0.008836 | 2.0538 | 0.037649 | HPG-AHA; MET-AHA             |
| 378.1742 | 5.4629 | 0.008859 | 2.0526 | 0.037705 | HPG-CTRL; MET-CTRL           |
| 859.6124 | 5.4607 | 0.008873 | 2.0519 | 0.037719 | HPG-CTRL                     |
| 156.059  | 5.4503 | 0.008939 | 2.0487 | 0.037951 | CTRL-AHA; MET-CTRL           |
| 743.3573 | 5.4472 | 0.008958 | 2.0478 | 0.037989 | CTRL-AHA                     |
| 393.1975 | 5.4322 | 0.009054 | 2.0432 | 0.038349 | HPG-AHA; MET-HPG             |
| 402.3499 | 5.4256 | 0.009095 | 2.0412 | 0.03848  | CTRL-AHA; HPG-CTRL           |
| 729.4556 | 5.4077 | 0.009211 | 2.0357 | 0.038924 | HPG-AHA; MET-HPG             |
| 243.1    | 5.4004 | 0.009259 | 2.0334 | 0.039081 | HPG-AHA; MET-AHA             |
| 113.1043 | 5.3781 | 0.009407 | 2.0266 | 0.039656 | CTRL-AHA; HPG-CTRL           |
| 122.9214 | 5.3722 | 0.009446 | 2.0247 | 0.039733 | HPG-CTRL                     |
| 218.0622 | 5.3721 | 0.009447 | 2.0247 | 0.039733 | HPG-CTRL                     |
| 103.9531 | 5.3545 | 0.009566 | 2.0193 | 0.040175 | HPG-CTRL                     |
| 503.1652 | 5.3532 | 0.009575 | 2.0189 | 0.040175 | CTRL-AHA; HPG-AHA            |
| 164.9262 | 5.3465 | 0.00962  | 2.0168 | 0.04032  | CTRL-AHA                     |
| 345.0149 | 5.3401 | 0.009664 | 2.0148 | 0.040457 | CTRL-AHA; HPG-CTRL           |
| 777.4742 | 5.3291 | 0.009741 | 2.0114 | 0.040728 | HPG-CTRL                     |
| 282.1068 | 5.3238 | 0.009777 | 2.0098 | 0.040832 | CTRL-AHA; HPG-AHA; MET-AHA   |
| 685.0449 | 5.3148 | 0.00984  | 2.007  | 0.041047 | HPG-CTRL; MET-HPG            |
| 724.3783 | 5.3037 | 0.009918 | 2.0036 | 0.041325 | CTRL-AHA; HPG-AHA            |
| 825.4211 | 5.2983 | 0.009957 | 2.0019 | 0.041438 | HPG-AHA; MET-HPG             |
| 686.2203 | 5.2889 | 0.010024 | 1.999  | 0.041626 | HPG-AHA; HPG-CTRL; MET-HPG   |
| 260.092  | 5.2887 | 0.010025 | 1.9989 | 0.041626 | HPG-AHA; MET-AHA             |
| 292.1449 | 5.2828 | 0.010068 | 1.9971 | 0.041754 | HPG-AHA; HPG-CTRL; MET-HPG   |
| 265.1069 | 5.2785 | 0.010099 | 1.9957 | 0.041833 | CTRL-AHA; HPG-CTRL           |
| 169.0707 | 5.2723 | 0.010144 | 1.9938 | 0.041972 | CTRL-AHA; MET-AHA            |
| 851.9508 | 5.2551 | 0.010269 | 1.9885 | 0.042443 | HPG-CTRL; MET-HPG            |
| 214.0543 | 5.2461 | 0.010335 | 1.9857 | 0.042666 | HPG-CTRL                     |
| 161.1248 | 5.2372 | 0.010402 | 1.9829 | 0.042893 | CTRL-AHA                     |
| 260.0489 | 5.2308 | 0.01045  | 1.9809 | 0.043038 | CTRL-AHA; HPG-CTRL; MET-CTRL |
| 617.0556 | 5.2149 | 0.01057  | 1.9759 | 0.043485 | CTRL-AHA; HPG-CTRL           |
| 159.0358 | 5.2091 | 0.010614 | 1.9741 | 0.043599 | MET-HPG                      |
| 290.1637 | 5.208  | 0.010622 | 1.9738 | 0.043599 | HPG-AHA; HPG-CTRL            |
| 112.0479 | 5.1922 | 0.010745 | 1.9688 | 0.04405  | CTRL-AHA; HPG-CTRL           |
| 435.0064 | 5.1904 | 0.010758 | 1.9683 | 0.044056 | MET-HPG                      |
| 278.8746 | 5.1862 | 0.010791 | 1.9669 | 0.044139 | CTRL-AHA; MET-CTRL           |
| 449.1345 | 5.1769 | 0.010863 | 1.964  | 0.044385 | CTRL-AHA                     |
| 688.1451 | 5.1714 | 0.010907 | 1.9623 | 0.04448  | HPG-CTRL                     |
| 308.0426 | 5.1708 | 0.010912 | 1.9621 | 0.04448  | HPG-CTRL                     |
| 307.0599 | 5.1663 | 0.010947 | 1.9607 | 0.044574 | CTRL-AHA                     |
| 296.2165 | 5.1627 | 0.010976 | 1.9596 | 0.04464  | CTRL-AHA; HPG-CTRL           |
| 649.2657 | 5.1573 | 0.011019 | 1.9579 | 0.044763 | HPG-CTRL                     |
| 744.2565 | 5.1462 | 0.011107 | 1.9544 | 0.045059 | CTRL-AHA                     |
| 88.03713 | 5.145  | 0.011117 | 1.954  | 0.045059 | MET-AHA; MET-HPG             |
| 666.1204 | 5.141  | 0.011149 | 1.9528 | 0.045138 | HPG-CTRL                     |
| 834.5365 | 5.128  | 0.011254 | 1.9487 | 0.0455   | HPG-CTRL                     |

|          |        |          |        |          |                              |
|----------|--------|----------|--------|----------|------------------------------|
| 550.2256 | 5.1269 | 0.011264 | 1.9483 | 0.0455   | CTRL-AHA; HPG-CTRL           |
| 182.9575 | 5.1203 | 0.011318 | 1.9462 | 0.045667 | CTRL-AHA; HPG-CTRL; MET-CTRL |
| 294.0544 | 5.0976 | 0.011506 | 1.9391 | 0.046372 | HPG-CTRL; MET-HPG            |
| 151.9877 | 5.0869 | 0.011596 | 1.9357 | 0.046683 | HPG-CTRL                     |
| 244.8948 | 5.0784 | 0.011667 | 1.933  | 0.046919 | HPG-CTRL                     |
| 117.0516 | 5.0739 | 0.011705 | 1.9316 | 0.047019 | HPG-CTRL                     |
| 292.8122 | 5.0649 | 0.011782 | 1.9288 | 0.047274 | HPG-CTRL                     |
| 399.9637 | 5.0626 | 0.011802 | 1.928  | 0.047301 | HPG-CTRL; MET-HPG            |
| 392.1779 | 5.06   | 0.011825 | 1.9272 | 0.047339 | HPG-CTRL; MET-HPG            |
| 432.7755 | 5.042  | 0.011981 | 1.9215 | 0.047911 | CTRL-AHA; HPG-CTRL; MET-CTRL |
| 275.078  | 5.0397 | 0.012002 | 1.9208 | 0.04794  | HPG-CTRL                     |
| 280.1333 | 5.0272 | 0.012111 | 1.9168 | 0.048323 | CTRL-AHA; HPG-CTRL           |
| 396.9908 | 5.0158 | 0.012213 | 1.9132 | 0.048674 | HPG-CTRL                     |
| 320.1855 | 5.005  | 0.01231  | 1.9097 | 0.048987 | HPG-CTRL; MET-HPG            |
| 231.1291 | 5.004  | 0.012319 | 1.9094 | 0.048987 | HPG-CTRL; MET-HPG            |
| 266.1098 | 5.0007 | 0.012349 | 1.9084 | 0.049053 | CTRL-AHA                     |
| 592.5292 | 4.9964 | 0.012387 | 1.907  | 0.049131 | HPG-CTRL; MET-HPG            |
| 344.1288 | 4.9932 | 0.012416 | 1.906  | 0.049131 | CTRL-AHA; HPG-CTRL           |
| 527.8404 | 4.9926 | 0.012422 | 1.9058 | 0.049131 | CTRL-AHA; HPG-CTRL           |
| 323.0582 | 4.9924 | 0.012424 | 1.9058 | 0.049131 | HPG-CTRL                     |
| 872.948  | 4.9895 | 0.01245  | 1.9048 | 0.049181 | CTRL-AHA; HPG-CTRL           |
| 178.1301 | 4.9735 | 0.012598 | 1.8997 | 0.049684 | CTRL-AHA                     |
| 499.1641 | 4.9727 | 0.012605 | 1.8995 | 0.049684 | CTRL-AHA                     |

**Table S7.** NMR metabolites.

| Metabolite                    | Control |      | Met-50µM |       | AHA-50µM |      | HPG-50µM |      |
|-------------------------------|---------|------|----------|-------|----------|------|----------|------|
|                               | Average | SD   | Average  | SD    | Average  | SD   | Average  | SD   |
| 2-Aminobutyrate               | 6.1     | 0.8  | 7.9      | 1.2   | 11.2     | 1.8  | 13       | 0.3  |
| 4-Aminobutyrate *             | 136.5   | 24.4 | 118.2    | 43.4  | 177.7    | 30.6 | 122.3    | 73.5 |
| Acetate *                     | 656.4   | 82.9 | 763.9    | 109.5 | 795.4    | 92.9 | 1001     | 90.7 |
| Acetoacetate *                | 2.8     | 0.7  | 3.4      | 1.3   | 3.2      | 0.5  | 2.9      | 0.8  |
| Acetoin *                     | 3.8     | 3.4  | 3        | 1.2   | 2.5      | 0.8  | 5.1      | 1    |
| Adenosine *                   | 1.8     | 1.3  | 1.9      | 0.3   | 1.4      | 0.2  | 1.3      | 0.1  |
| ADP                           | 4.7     | 0.5  | 5.8      | 0.5   | 6.7      | 0.9  | 7.6      | 1.3  |
| Alanine                       | 178.7   | 36.8 | 208.9    | 22.4  | 288.3    | 52.9 | 344.5    | 39.6 |
| AMP                           | 25.9    | 3.5  | 33       | 3.2   | 43       | 8.7  | 62.7     | 3.9  |
| Aspartate                     | 18.3    | 7.2  | 23.2     | 12.3  | 13.6     | 1.6  | 18.5     | 1.6  |
| ATP                           | 2.6     | 0.9  | 4.7      | 1.2   | 5.7      | 1.4  | 6.2      | 1.7  |
| Betaine                       | 4.7     | 2.8  | 2.8      | 0.1   | 4        | 0.2  | 2.2      | 0.5  |
| Cholate                       | 2.4     | 1    | 2.6      | 0.5   | 3.1      | 0.7  | 3.7      | 0.7  |
| Choline                       | 1.5     | 1    | 1        | 0.1   | 1.3      | 0.2  | 1.3      | 0.1  |
| Dimethyl sulfone *            | 1.2     | 1.3  | 0.8      | 0.3   | 0.7      | 0.1  | 1        | 0.2  |
| Dimethylamine                 | 0.5     | 0    | 0.7      | 0.2   | 0.8      | 0.1  | 1.3      | 0.3  |
| dTTP *                        | 23.4    | 1.9  | 26.6     | 2.5   | 35.5     | 5    | 29.6     | 3.9  |
| Formate                       | 382.5   | 50.2 | 678.9    | 36.6  | 705.6    | 69.4 | 642.7    | 16.6 |
| Fumarate                      | 6.5     | 1    | 5.8      | 0.9   | 4.8      | 0.9  | 11.2     | 2    |
| Glucose                       | 49      | 38.6 | 48.6     | 40.6  | 19.8     | 3.4  | 33.6     | 17.6 |
| Glutamate                     | 63.2    | 38.7 | 79.3     | 41.5  | 103.3    | 23.4 | 138.6    | 71.1 |
| Glutathione                   | 51.8    | 10.3 | 63.8     | 10.2  | 85.2     | 8.4  | 122.3    | 8.6  |
| Glycine                       | 50.4    | 15.8 | 57.8     | 11.1  | 104.2    | 10.4 | 81       | 5.5  |
| GTP *                         | 3.7     | 0.9  | 4.4      | 0.6   | 4.9      | 0.6  | 7.5      | 1.2  |
| Histamine                     | 2.4     | 0.7  | 2.1      | 0.5   | 3        | 1.1  | 3.9      | 0.6  |
| Histidine                     | 2.2     | 0.3  | 2.6      | 0.7   | 3.1      | 0.6  | 3.4      | 0.5  |
| Hypoxanthine                  | 17.2    | 5    | 23.1     | 1.4   | 27.4     | 4.5  | 26.8     | 5.8  |
| IMP                           | 3.4     | 1    | 5        | 0.8   | 5.6      | 1.7  | 7.1      | 0.3  |
| Isoleucine                    | 7.4     | 0.5  | 9.1      | 1     | 11.7     | 1.7  | 15.4     | 2.2  |
| Lactate                       | 53.9    | 21.1 | 104.5    | 43.4  | 130      | 40.1 | 123.3    | 24.3 |
| Leucine                       | 14.4    | 1.3  | 17.8     | 1.8   | 23       | 3.6  | 27.5     | 3.6  |
| Malate                        | 58.1    | 4.1  | 61.9     | 7.1   | 63.4     | 7.5  | 143.6    | 8.8  |
| Methionine                    | 6.7     | 1.3  | 8.3      | 1.2   | 13.3     | 1.5  | 14.2     | 1.4  |
| N-Acetylaspartate *           | 54.2    | 12.7 | 96.9     | 5.6   | 101      | 10.9 | 61.2     | 12.9 |
| N-Acetylglutamate *           | 5.9     | 1.1  | 6.1      | 1.3   | 7.2      | 0.5  | 11.7     | 2.5  |
| N-Acetylglycine               | 3.5     | 0.4  | 3.6      | 0.8   | 4.4      | 0.5  | 6.6      | 0.7  |
| NAD <sup>+</sup>              | 15.1    | 0.7  | 21       | 3.4   | 27.2     | 4.5  | 30.4     | 3    |
| N-Carbamoylaspartate *        | 83.3    | 25   | 117.7    | 25.4  | 128.4    | 10.2 | 61.9     | 17.9 |
| O-Phosphocholine *            | 0.7     | 0.2  | 0.7      | 0.1   | 1        | 0.1  | 0.7      | 0.1  |
| Pantothenate                  | 3.6     | 1.8  | 4.6      | 0.7   | 2.9      | 1.1  | 4.8      | 1.6  |
| Phenylalanine                 | 5.5     | 0.6  | 5.9      | 0.5   | 8.1      | 1.1  | 10.3     | 1    |
| Putrescine                    | 5.9     | 1.4  | 7.2      | 0.7   | 11       | 2.1  | 16       | 1.6  |
| Pyruvate                      | 22.8    | 13.2 | 42.3     | 9.8   | 36.2     | 9.4  | 64.1     | 16.6 |
| sn-Glycero-3-phosphocholine * | 2       | 0.8  | 1.2      | 0.2   | 2.1      | 0.3  | 2.5      | 0.6  |
| Succinate                     | 152.9   | 19.3 | 205.9    | 16.2  | 259.5    | 34.6 | 316.5    | 50   |
| Tartrate                      | 6.6     | 0.9  | 8.2      | 1.8   | 10.4     | 1.3  | 12.8     | 1.4  |
| Trimethylamine N-oxide        | 0.6     | 0.7  | 0.2      | 0.2   | 0.1      | 0.1  | 0.3      | 0.1  |
| Tyrosine                      | 12.7    | 2.1  | 17.6     | 1.8   | 22.4     | 2.8  | 25.5     | 3.8  |
| UDP-glucose *                 | 8.1     | 2.9  | 10.1     | 1.1   | 13.5     | 1.4  | 19.8     | 1.3  |
| UDP-N-Acetylglucosamine *     | 3.1     | 1.1  | 2.8      | 1.8   | 2.8      | 0.6  | 3.5      | 0.6  |
| UMP                           | 20.4    | 2.8  | 19.7     | 1.4   | 26.8     | 3    | 35.7     | 1.2  |
| Uracil                        | 27.6    | 5.2  | 34.2     | 3     | 41.2     | 5.8  | 45.3     | 4.7  |
| Valine                        | 18.7    | 2.6  | 23.3     | 1.5   | 31.5     | 6.6  | 43.7     | 7.1  |
| Xanthosine                    | 1.4     | 0.3  | 1.9      | 0.2   | 1.4      | 0.3  | 1.3      | 0.2  |

\*Assignment with best-matched signals, all others validated.

**Table S8.** Loading factors for 2D-PCA scores plot of heat-stressed *E. coli* cultures from Figure 3B.

| <b>Metabolite</b>      | <b>PC1</b> | <b>PC2</b> |
|------------------------|------------|------------|
| 2-Aminobutyrate        | 0.18327    | -0.042002  |
| 4-Aminobutyrate        | -0.012652  | -0.18683   |
| ADP                    | 0.16284    | -0.087807  |
| AMP                    | 0.17848    | 0.0011266  |
| ATP                    | 0.13204    | -0.18101   |
| Acetate                | 0.16316    | -0.010254  |
| Acetoacetate           | 0.015504   | -0.14884   |
| Acetoin                | 0.069363   | 0.17966    |
| Adenosine              | -0.0073455 | 0.018199   |
| Alanine                | 0.17416    | -0.029211  |
| Aspartate              | 0.0020064  | 0.10747    |
| Betaine                | -0.069893  | -0.0070998 |
| Cholate                | 0.1413     | 0.059908   |
| Choline                | 0.046082   | 0.16315    |
| Dimethyl sulfone       | 0.029407   | 0.2601     |
| Dimethylamine          | 0.15715    | 0.091441   |
| Formate                | 0.12576    | -0.26046   |
| Fumarate               | 0.083996   | 0.29072    |
| GTP                    | 0.15447    | 0.014695   |
| Glucose                | -0.051666  | 0.053545   |
| Glutamate              | 0.10733    | 0.089474   |
| Glutathione            | 0.17402    | 0.030719   |
| Glycine                | 0.12451    | -0.14154   |
| Histamine              | 0.13025    | 0.076048   |
| Histidine              | 0.1491     | 0.0034941  |
| Hypoxanthine           | 0.14492    | -0.10708   |
| IMP                    | 0.16094    | 0.0042664  |
| Isoleucine             | 0.18581    | 0.00074766 |
| Lactate                | 0.13004    | -0.124     |
| Leucine                | 0.18495    | -0.021526  |
| Malate                 | 0.15156    | 0.18264    |
| Methionine             | 0.17547    | -0.054267  |
| N-Acetylaspartate      | 0.021105   | -0.29746   |
| N-Acetylglutamate      | 0.14634    | 0.18789    |
| N-Acetylglycine        | 0.16222    | 0.079985   |
| N-Carbamoylaspartate   | -0.055414  | -0.35668   |
| NAD <sup>+</sup>       | 0.17684    | -0.083403  |
| O-Phosphocholine       | 0.07488    | -0.089337  |
| Pantothenate           | 0.046712   | 0.11346    |
| Phenylalanine          | 0.18293    | 0.04043    |
| Propylene glycol       | 0.17549    | -0.065088  |
| Putrescine             | 0.18109    | 0.029436   |
| Pyruvate               | 0.11508    | -0.057185  |
| Succinate              | 0.18301    | -0.05308   |
| Tartrate               | 0.16883    | -0.0016467 |
| Trimethylamine N-oxide | 0.021261   | 0.27334    |
| Tyrosine               | 0.17679    | -0.090745  |

|                             |           |           |
|-----------------------------|-----------|-----------|
| UDP-N-Acetylglucosamine     | 0.020713  | 0.12983   |
| UDP-glucose                 | 0.16733   | -0.010497 |
| UMP                         | 0.16571   | 0.062401  |
| Uracil                      | 0.17514   | -0.047694 |
| Valine                      | 0.18301   | 0.029837  |
| Xanthosine                  | -0.059567 | -0.14554  |
| dTTP                        | 0.12974   | -0.18943  |
| sn-Glycero-3-phosphocholine | 0.093846  | 0.14058   |

**Table S9.** ANOVA of heat-stressed NMR metabolites.

| #  | Compound                    | f.value | p.value  | -log <sub>10</sub> (p) |
|----|-----------------------------|---------|----------|------------------------|
| 1  | Malate                      | 100.3   | 1.38E-10 | 9.9                    |
| 2  | Formate                     | 51.6    | 1.91E-08 | 7.7                    |
| 3  | UMP                         | 41.8    | 8.46E-08 | 7.1                    |
| 4  | Putrescine                  | 37.7    | 1.74E-07 | 6.8                    |
| 5  | Methionine                  | 36.8    | 2.07E-07 | 6.7                    |
| 6  | Glutathione                 | 35.2    | 2.83E-07 | 6.5                    |
| 7  | 2-Aminobutyrate             | 34.7    | 3.10E-07 | 6.5                    |
| 8  | Phenylalanine               | 34.6    | 3.14E-07 | 6.5                    |
| 9  | AMP                         | 34.5    | 3.24E-07 | 6.5                    |
| 10 | Isoleucine                  | 32.2    | 5.18E-07 | 6.3                    |
| 11 | NAD <sup>+</sup>            | 30      | 8.28E-07 | 6.1                    |
| 12 | Succinate                   | 28.5    | 1.17E-06 | 5.9                    |
| 13 | Tyrosine                    | 26.4    | 1.96E-06 | 5.7                    |
| 14 | Leucine                     | 25.8    | 2.25E-06 | 5.6                    |
| 15 | Valine                      | 24.1    | 3.53E-06 | 5.5                    |
| 16 | Fumarate                    | 24      | 3.66E-06 | 5.4                    |
| 17 | Dimethylamine               | 22.4    | 5.64E-06 | 5.2                    |
| 18 | UDP-glucose                 | 21.2    | 8.12E-06 | 5.1                    |
| 19 | N-Acetylaspartate           | 20.9    | 8.91E-06 | 5                      |
| 20 | N-Acetylglycine             | 19.9    | 1.18E-05 | 4.9                    |
| 21 | Tartrate                    | 17.3    | 2.80E-05 | 4.6                    |
| 22 | Alanine                     | 16.9    | 3.19E-05 | 4.5                    |
| 23 | N-Acetylglutamate           | 15.2    | 6.09E-05 | 4.2                    |
| 24 | GTP                         | 15      | 6.58E-05 | 4.2                    |
| 25 | Uracil                      | 13.7    | 1.08E-04 | 4                      |
| 26 | dTTP                        | 11.5    | 2.82E-04 | 3.5                    |
| 27 | Glycine                     | 11.5    | 2.84E-04 | 3.5                    |
| 28 | Acetate                     | 11.2    | 3.25E-04 | 3.5                    |
| 29 | ADP                         | 11.1    | 3.48E-04 | 3.5                    |
| 30 | IMP                         | 10.4    | 4.90E-04 | 3.3                    |
| 31 | ATP                         | 9.9     | 6.37E-04 | 3.2                    |
| 32 | N-Carbamoylaspartate        | 9.7     | 7.02E-04 | 3.2                    |
| 33 | sn-Glycero-3-phosphocholine | 7.9     | 1.85E-03 | 2.7                    |
| 34 | Pyruvate                    | 7.3     | 2.60E-03 | 2.6                    |
| 35 | Lactate                     | 7.2     | 2.75E-03 | 2.6                    |
| 36 | Hypoxanthine                | 6.4     | 4.57E-03 | 2.3                    |
| 37 | Betaine                     | 5       | 1.22E-02 | 1.9                    |
| 38 | Histidine                   | 4.9     | 1.33E-02 | 1.9                    |
| 39 | Xanthosine                  | 4.6     | 1.65E-02 | 1.8                    |
| 40 | Histamine                   | 4.5     | 1.76E-02 | 1.8                    |
| 41 | O-Phosphocholine            | 3.7     | 3.38E-02 | 1.5                    |

**Table S10.** Fold changes from NMR heat-stressed data.

| Metabolite                  | Fold change |             |             |
|-----------------------------|-------------|-------------|-------------|
|                             | Met/Control | AHA/Control | HPG/Control |
| 2-Aminobutyrate             | 1.3         | 1.9         | 2.2         |
| 4-Aminobutyrate             | 0.9         | 1.3         | 0.9         |
| Acetate                     | 1.2         | 1.2         | 1.5         |
| Acetoacetate                | 1.2         | 1.1         | 1.0         |
| Acetoin                     | 0.8         | 0.6         | 1.3         |
| Adenosine                   | 1.1         | 0.8         | 0.7         |
| ADP                         | 1.2         | 1.4         | 1.6         |
| Alanine                     | 1.2         | 1.6         | 1.9         |
| AMP                         | 1.3         | 1.7         | 2.4         |
| Aspartate                   | 1.3         | 0.7         | 1.0         |
| ATP                         | 1.8         | 2.2         | 2.4         |
| Betaine                     | 0.6         | 0.9         | 0.5         |
| Cholate                     | 1.1         | 1.3         | 1.6         |
| Choline                     | 0.7         | 0.9         | 0.9         |
| Dimethyl sulfone            | 0.6         | 0.6         | 0.8         |
| Dimethylamine               | 1.2         | 1.4         | 2.3         |
| dTTP                        | 1.1         | 1.5         | 1.3         |
| Formate                     | 1.8         | 1.8         | 1.7         |
| Fumarate                    | 0.9         | 0.7         | 1.7         |
| Glucose                     | 1.0         | 0.4         | 0.7         |
| Glutamate                   | 1.3         | 1.6         | 2.2         |
| Glutathione                 | 1.2         | 1.6         | 2.4         |
| Glycine                     | 1.1         | 2.1         | 1.6         |
| GTP                         | 1.2         | 1.3         | 2.0         |
| Histamine                   | 0.9         | 1.2         | 1.6         |
| Histidine                   | 1.2         | 1.4         | 1.6         |
| Hypoxanthine                | 1.3         | 1.6         | 1.6         |
| IMP                         | 1.5         | 1.6         | 2.1         |
| Isoleucine                  | 1.2         | 1.6         | 2.1         |
| Lactate                     | 1.9         | 2.4         | 2.3         |
| Leucine                     | 1.2         | 1.6         | 1.9         |
| Malate                      | 1.1         | 1.1         | 2.5         |
| Methionine                  | 1.3         | 2.0         | 2.1         |
| N-Acetylaspartate           | 1.8         | 1.9         | 1.1         |
| N-Acetylglutamate           | 1.0         | 1.2         | 2.0         |
| N-Acetylglycine             | 1.0         | 1.3         | 1.9         |
| NAD <sup>+</sup>            | 1.4         | 1.8         | 2.0         |
| N-Carbamoylaspartate        | 1.4         | 1.5         | 0.7         |
| O-Phosphocholine            | 0.9         | 1.4         | 1.1         |
| Pantothenate                | 1.3         | 0.8         | 1.3         |
| Phenylalanine               | 1.1         | 1.5         | 1.9         |
| Putrescine                  | 1.2         | 1.9         | 2.7         |
| Pyruvate                    | 1.9         | 1.6         | 2.8         |
| sn-Glycero-3-phosphocholine | 0.6         | 1.0         | 1.3         |
| Succinate                   | 1.3         | 1.7         | 2.1         |
| Tartrate                    | 1.2         | 1.6         | 1.9         |
| Trimethylamine N-oxide      | 0.4         | 0.2         | 0.6         |

|                         |     |     |     |
|-------------------------|-----|-----|-----|
| Tyrosine                | 1.4 | 1.8 | 2.0 |
| UDP-glucose             | 1.3 | 1.7 | 2.5 |
| UDP-N-Acetylglucosamine | 0.9 | 0.9 | 1.1 |
| UMP                     | 1.0 | 1.3 | 1.8 |
| Uracil                  | 1.2 | 1.5 | 1.6 |
| Valine                  | 1.2 | 1.7 | 2.3 |
| Xanthosine              | 1.4 | 1.0 | 0.9 |
